# Supplementary material for: Facile Synthesis of the Naturally Cytotoxic Triterpenoid Saponin Patrinia-Glycoside B-II and Its Conformer
Source: MDPI journal article supplement (doi:10.3390/molecules181215193), 2013-12-10

## Supplementary Materials

**Table S1.** Optical rotation and melting point of Nature PB-II, Synthetic PB-II and Compound 1.

|                   | Nature PB-II              | Synthetic PB-II              | Compound 1                   |
|-------------------|---------------------------|------------------------------|------------------------------|
| $[\alpha]_D^{25}$ | −2.9 ( <i>c</i> 0.29, Py) | −27.5 ( <i>c</i> 0.49, MeOH) | −38.5 ( <i>c</i> 0.52, MeOH) |
| Mp                | 259.0–262.0 °C            | 260.2–262.3 °C               | 210.4–213.8 °C               |

**Table S2.**  $^1\text{H}$ -NMR data of Nature PB-II, Synthetic PB-II and Compound 1.

| Hydro No | Nature PB-II                | Synthetic PB-II             | Compound 1                  |
|----------|-----------------------------|-----------------------------|-----------------------------|
| Ara-H1   | 4.85 (d, <i>J</i> = 5.1 Hz) | 4.87 (d, <i>J</i> = 5.4 Hz) | 5.51 (s)                    |
| Rha-H1   | 6.11 (brs)                  | 6.20 (brs)                  | 5.87 (brs)                  |
| Glu-H1   | 5.08 (d, <i>J</i> = 7.7 Hz) | 5.13(d, <i>J</i> = 7.8 Hz)  | 4.98 (d, <i>J</i> = 7.8 Hz) |

**Table S3.**  $^{13}\text{C}$ -NMR data of Nature PB-II, Synthetic PB-II and Compound 1.

| Carbon No | Nature product | Synthetic product | Compound 1 |
|-----------|----------------|-------------------|------------|
| Ara       |                |                   |            |
| C-1       | 104.8          | 104.1             | 109.6      |
| C-2       | 74.8           | 74.5              | 88.6       |
| C-3       | 82.2           | 82.0              | 78.4       |
| C-4       | 68.1           | 67.9              | 82.3       |
| C-5       | 64.9           | 64.8              | 70.6       |
| Rha       |                |                   |            |
| C-1       | 101.9          | 101.7             | 101.5      |
| C-2       | 72.3           | 72.3              | 72.9       |
| C-3       | 72.5           | 72.3              | 72.8       |
| C-4       | 73.9           | 73.7              | 74.3       |
| C-5       | 70.0           | 69.8              | 70.6       |
| C-6       | 18.6           | 18.2              |            |
| Glu       |                |                   |            |
| C-1       | 104.7          | 104.1             | 105.4      |
| C-2       | 74.9           | 74.7              | 75.4       |
| C-3       | 78.2           | 78.3              | 78.9       |
| C-4       | 71.4           | 71.2              | 71.9       |
| C-5       | 76.5           | 78.0              | 78.8       |
| C-6       | 62.5           | 62.3              | 63.0       |

<sup>1</sup>H-, <sup>13</sup>C- and 2D-NMR data for compounds 1, 6-9, 11-13, PB-II

Figure S1. Structure of compound 6.

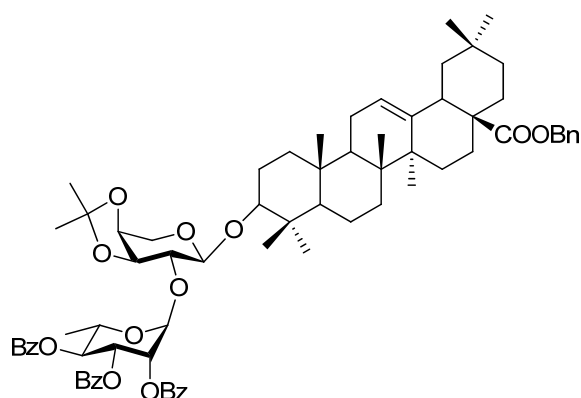Figure S2. <sup>1</sup>H-NMR of compound 6.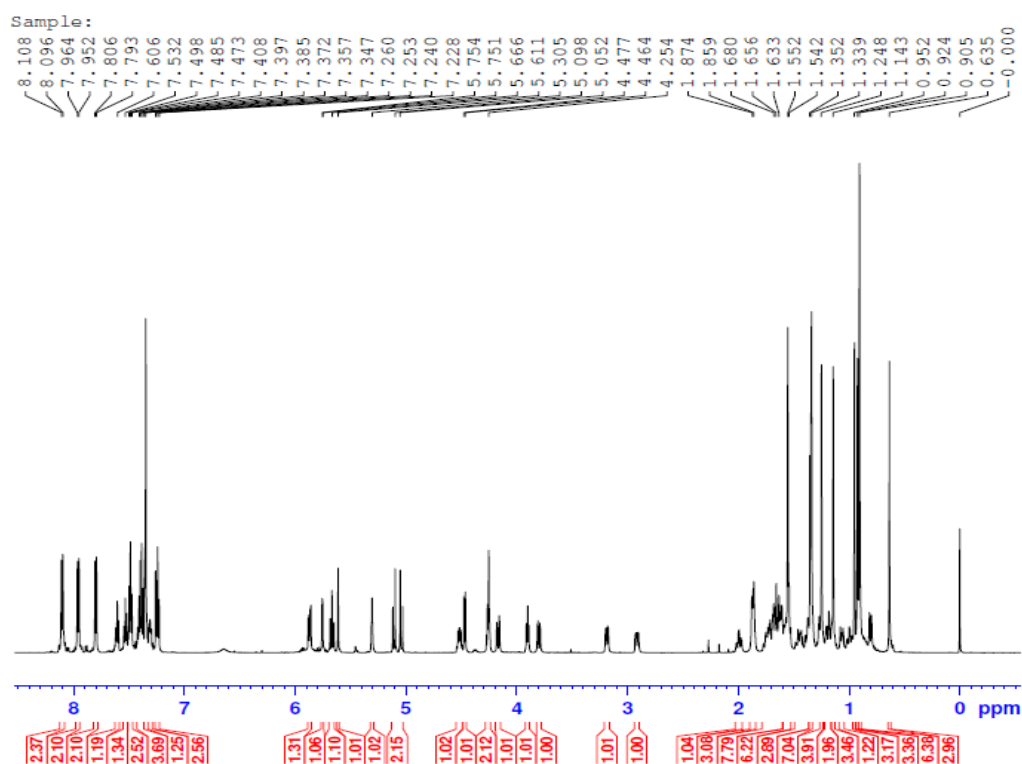

**Figure S3.**  $^{13}\text{C}$ -NMR of compound 6.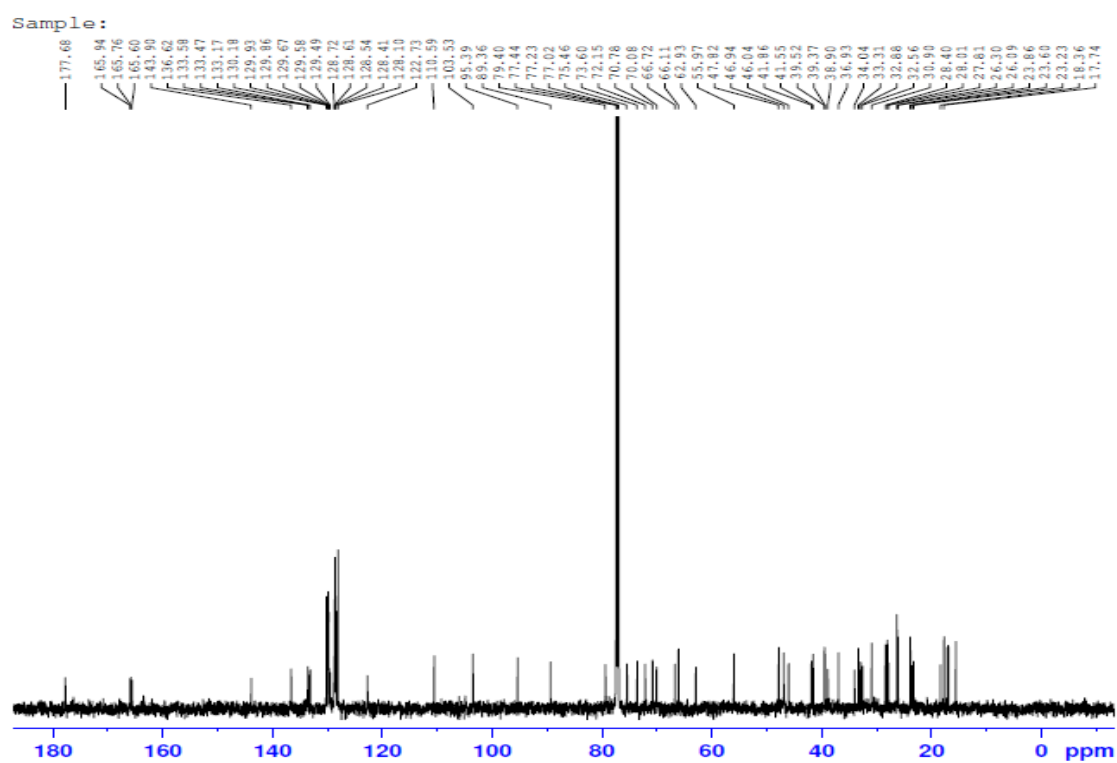**Figure S4.** COSY of compound 6.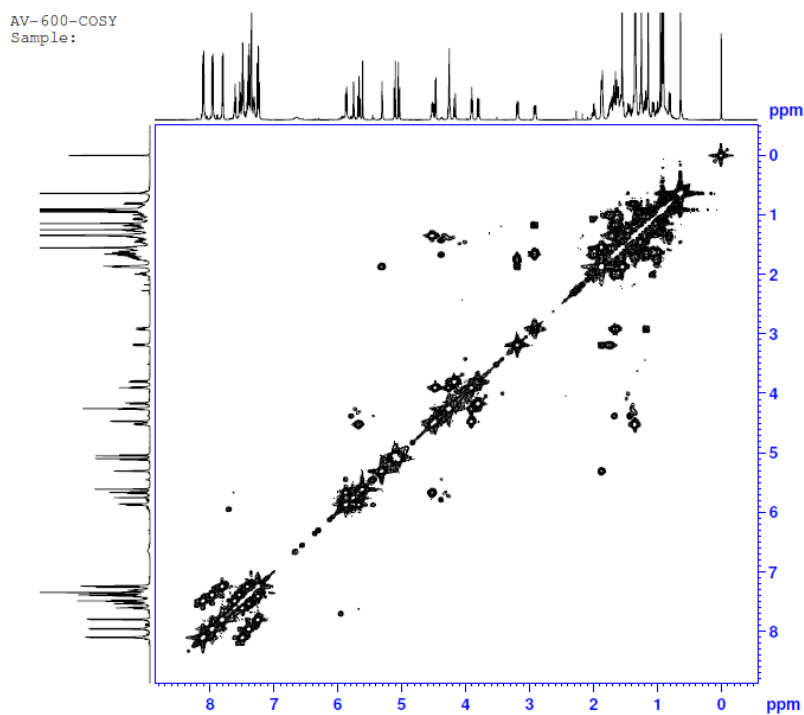

**Figure S5.** HSQC compound 6.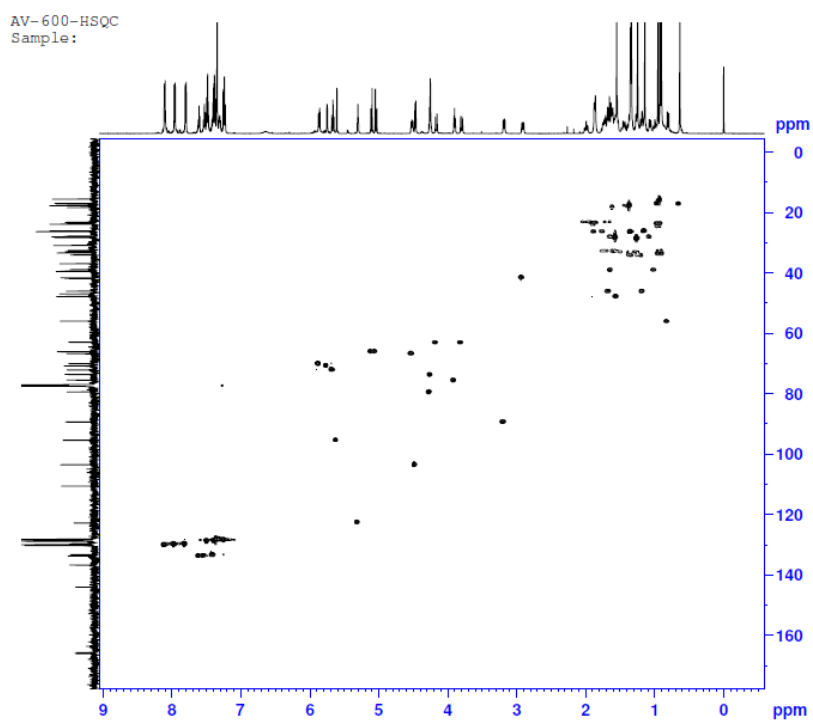**Figure S6.** HMBC compound 6.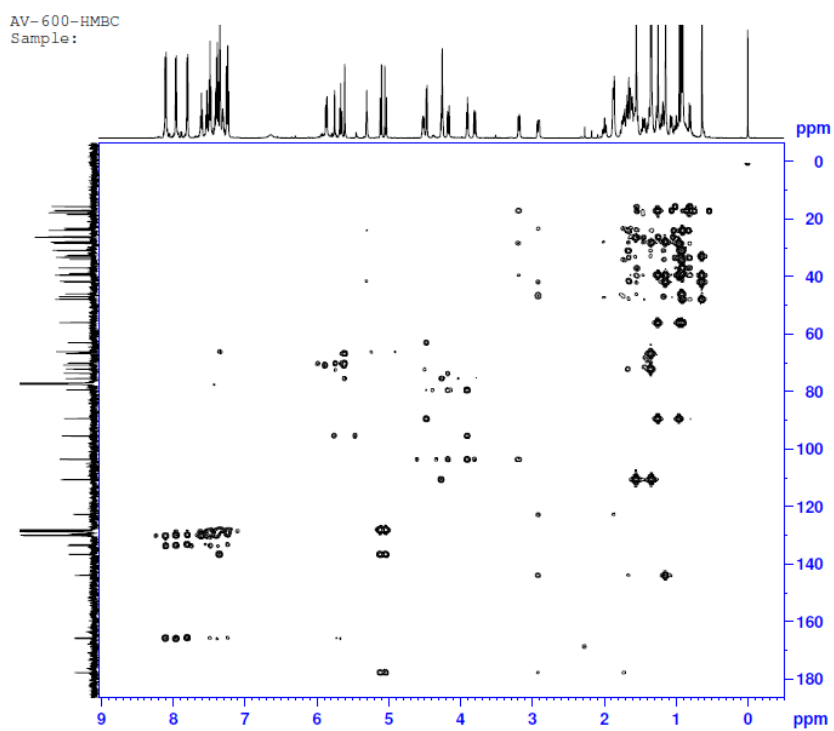

Figure S7. Structure of compound 7.

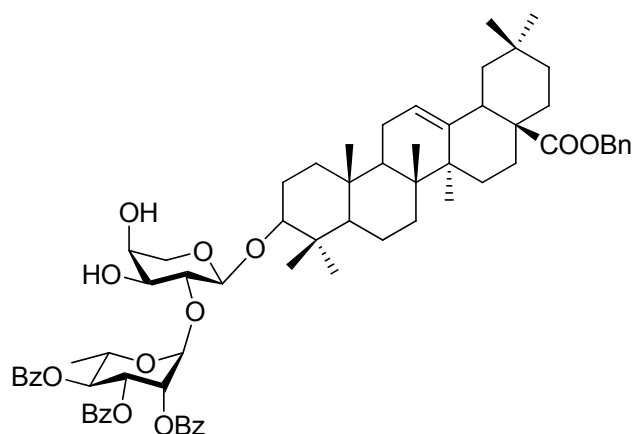Figure S8.  $^1\text{H}$ -NMR of compound 7.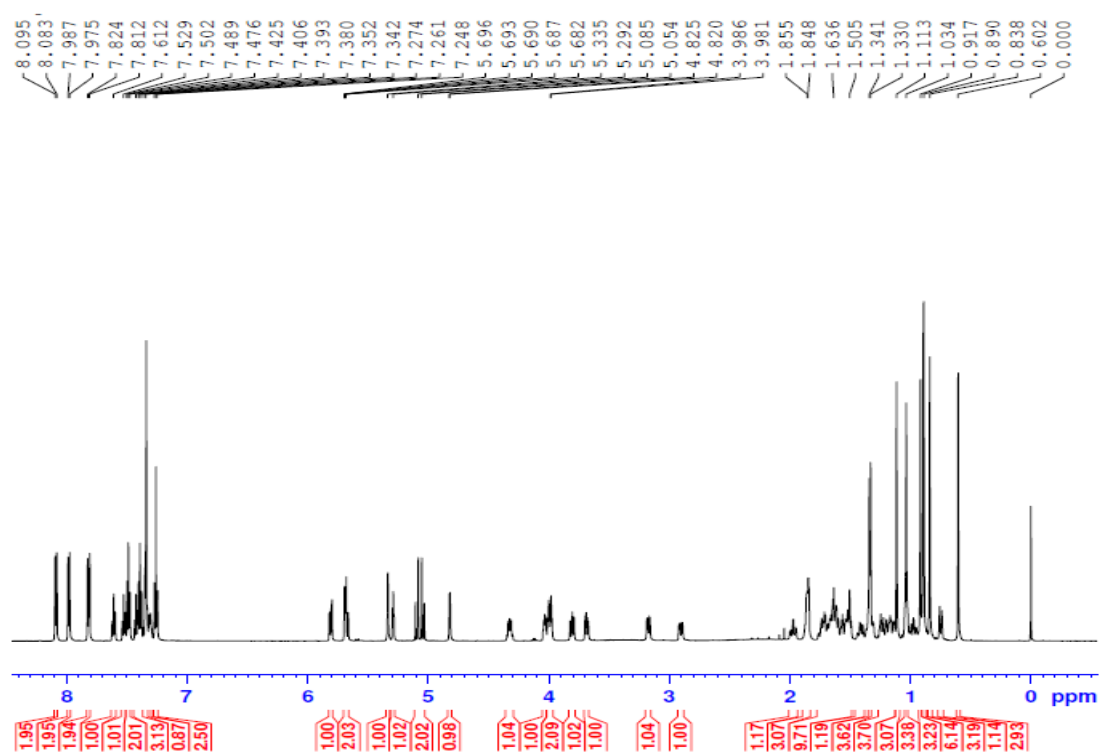

**Figure S9.**  $^{13}\text{C}$ -NMR of compound 7.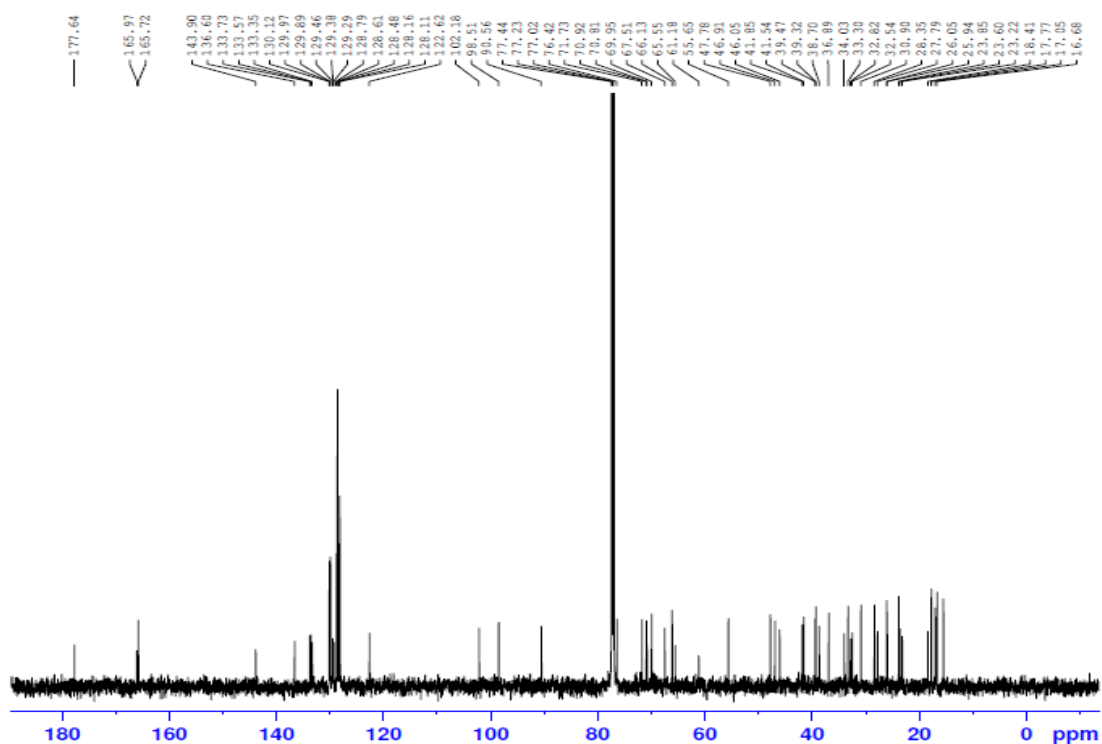**Figure S10.** COSY of compound 7.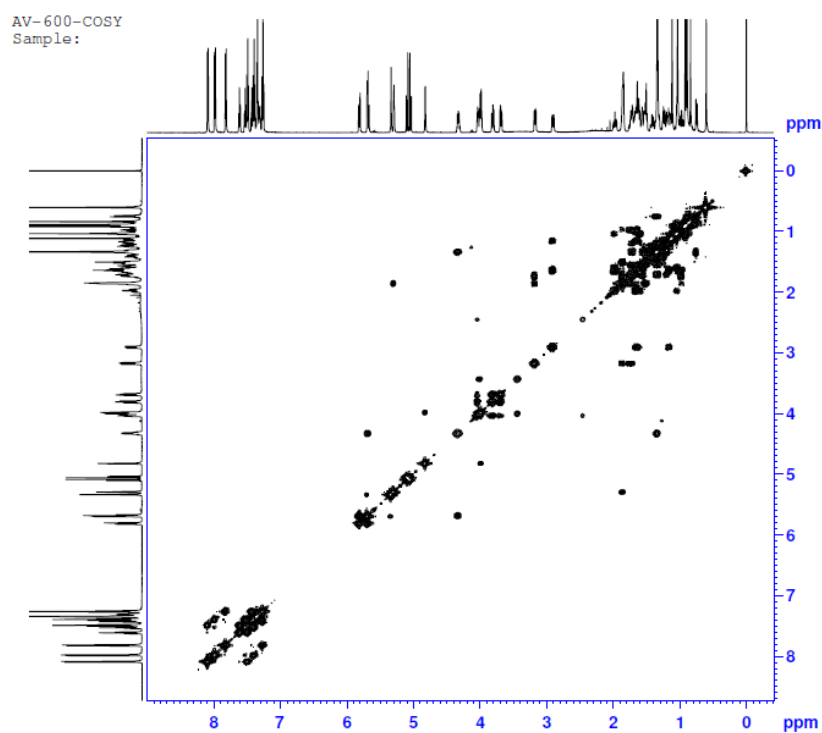

**Figure S11.** HSQC of compound 7.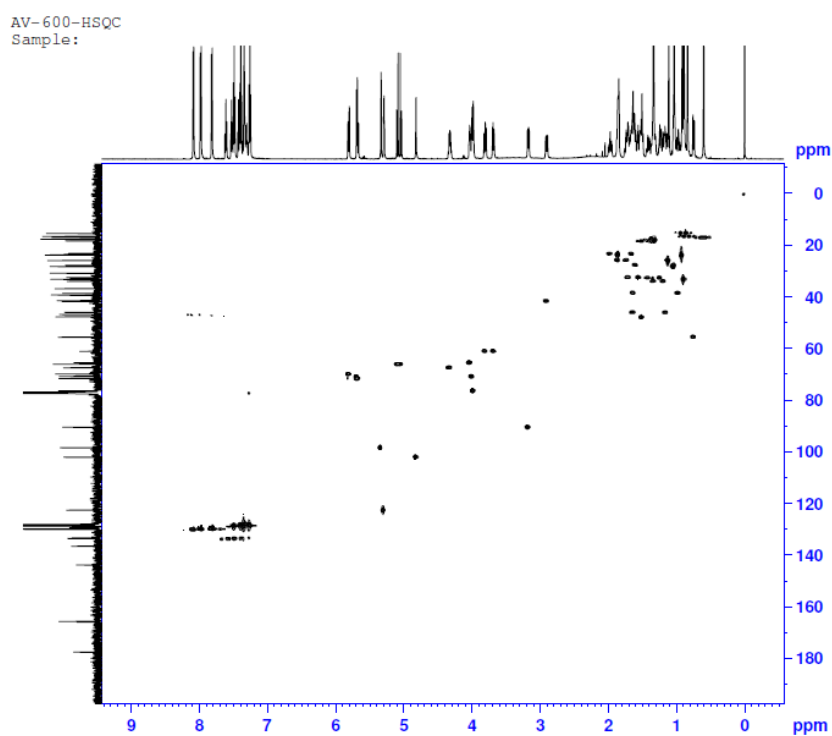**Figure S12.** HMBC of compound 7.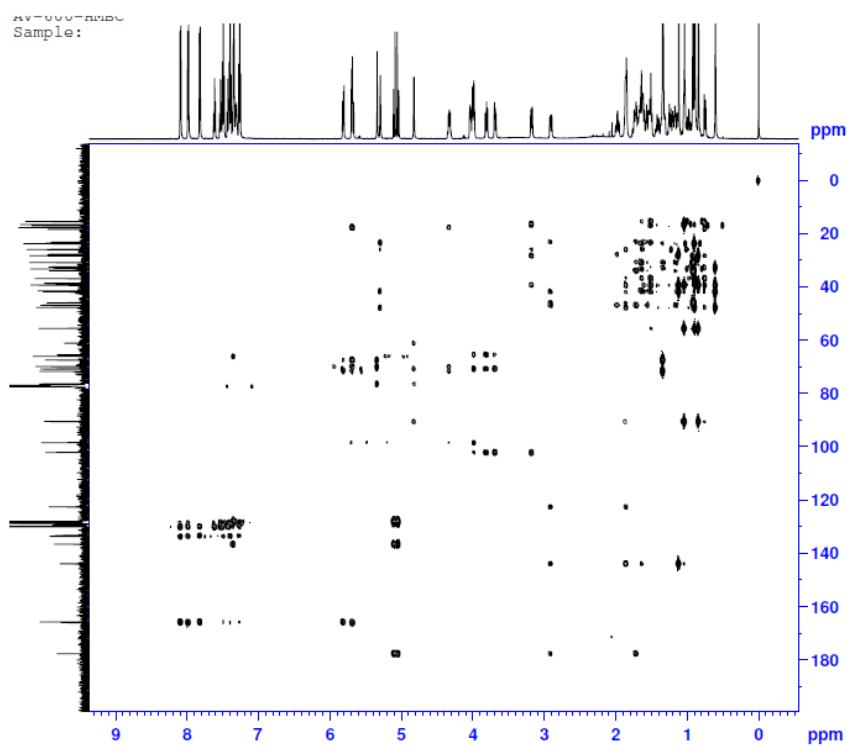

**Figure S13.** Structure of compound **8**.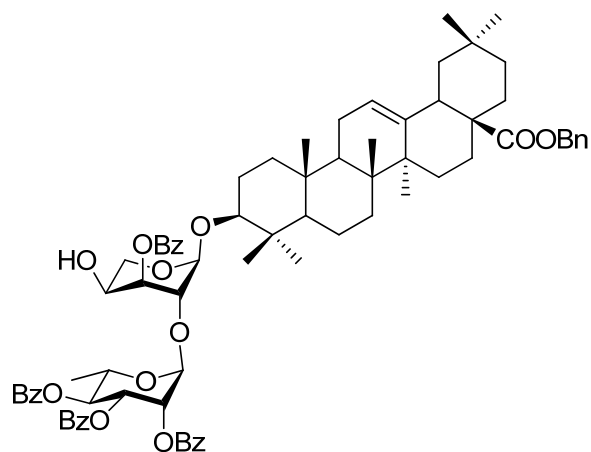**Figure S14.**  $^1\text{H}$ -NMR of compound **8**.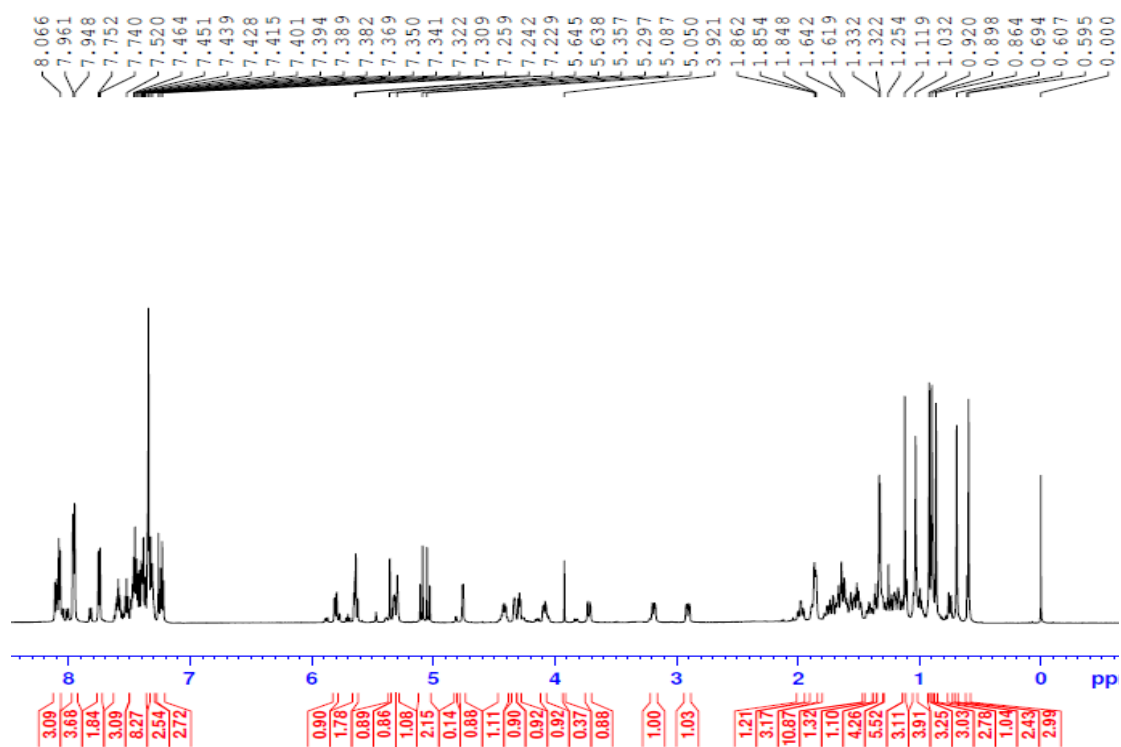



Figure S15.  $^{13}\text{C}$ -NMR of compound 8.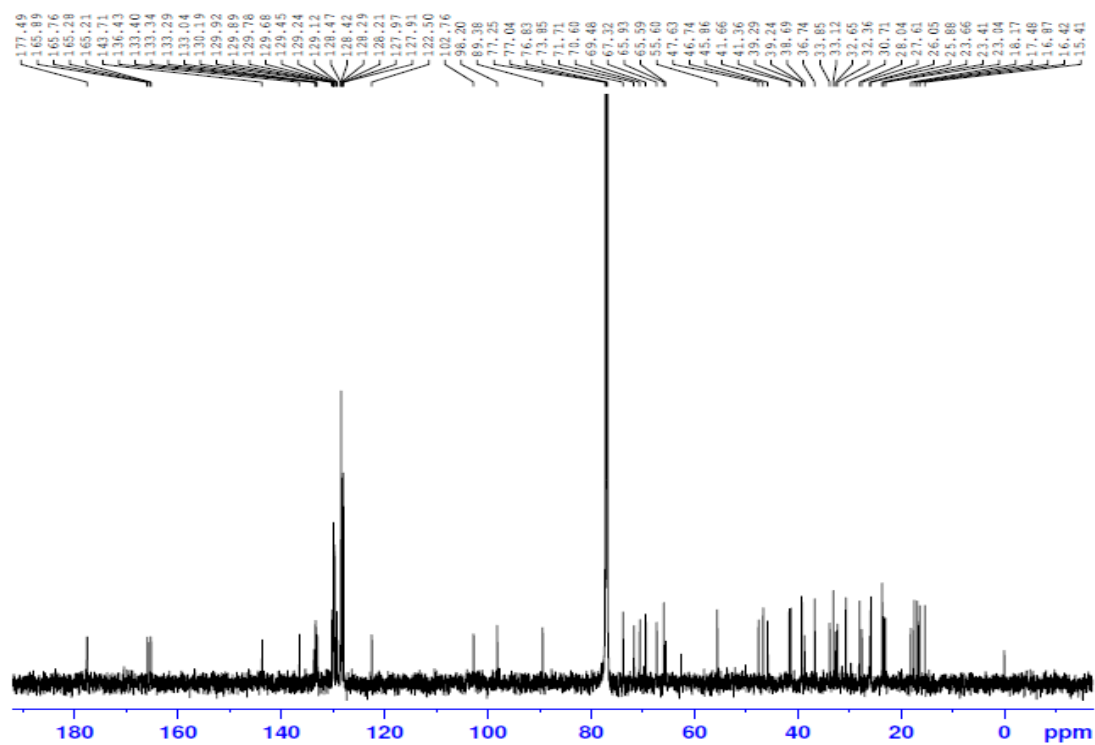

Figure S16. COSY of compound 8.

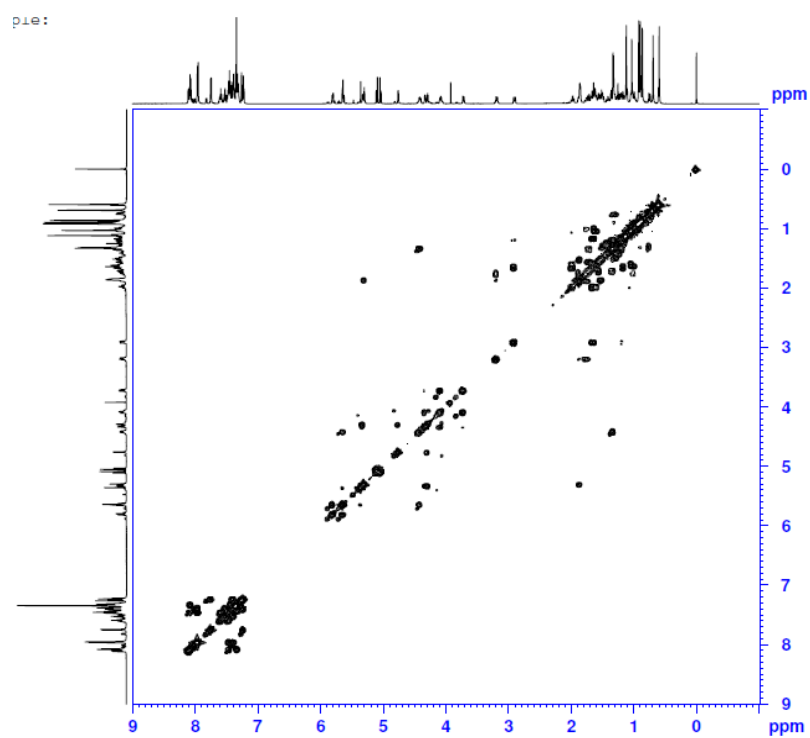

Figure S17. HSQC of compound 8.

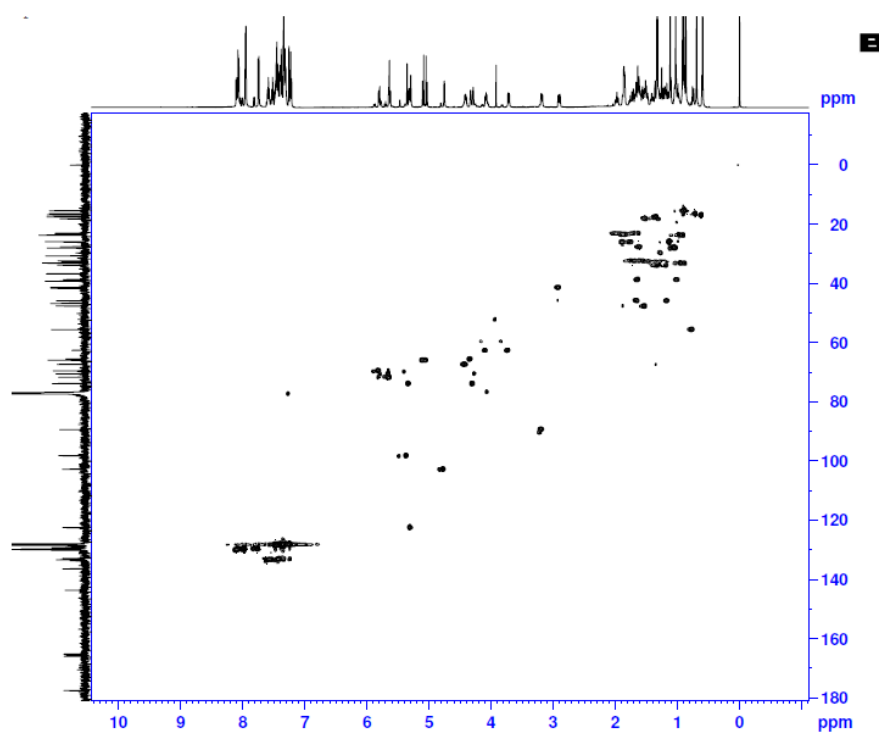

Figure S18. HMBC of compound 8.

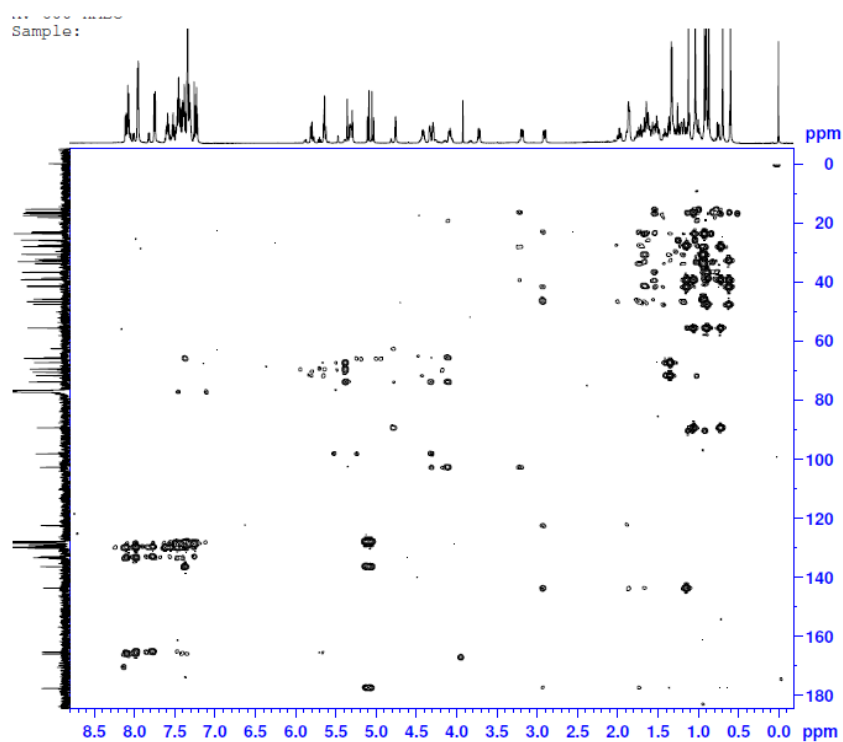

Figure S19. Structure of compound 9.

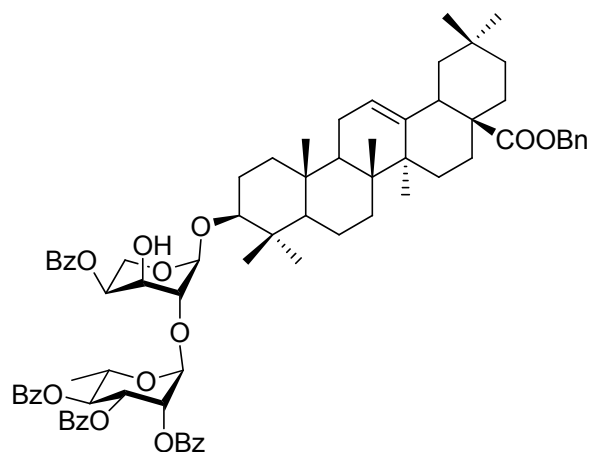Figure S20. <sup>1</sup>H-NMR of compound 9.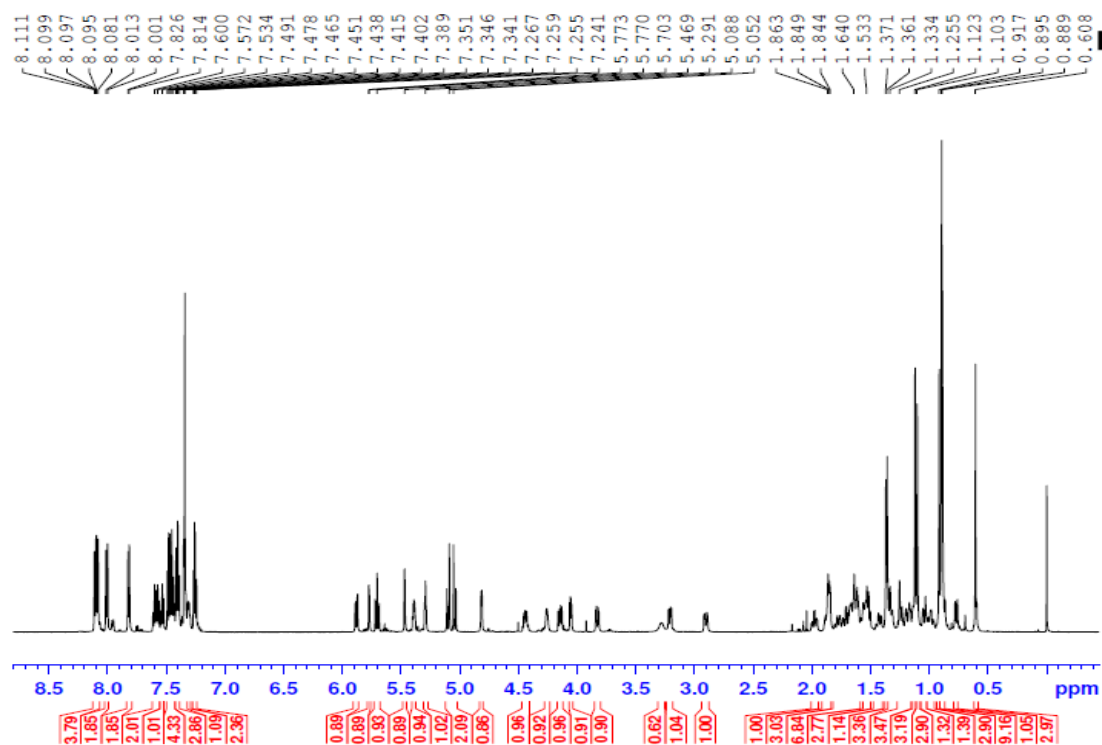

Figure S21.  $^{13}\text{C}$ -NMR of compound 9.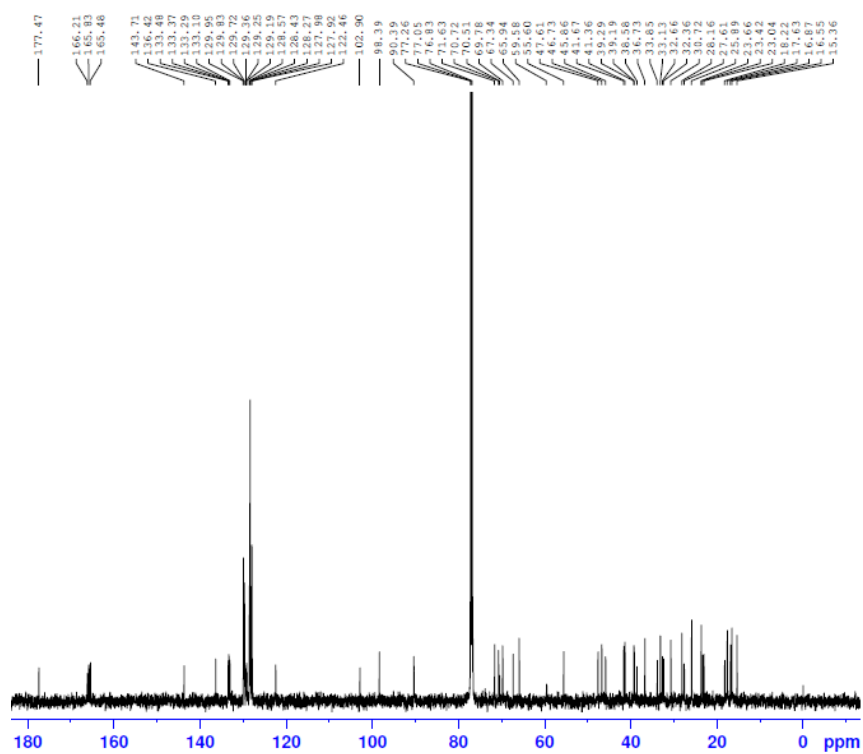

Figure S22. COSY of compound 9.

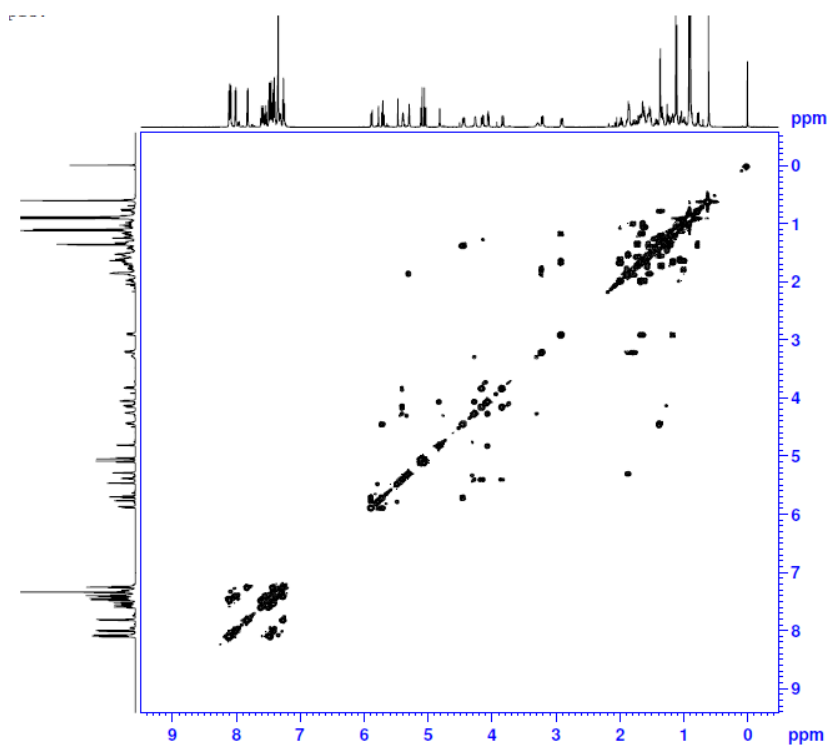

Figure S23. HSQC of compound 9.

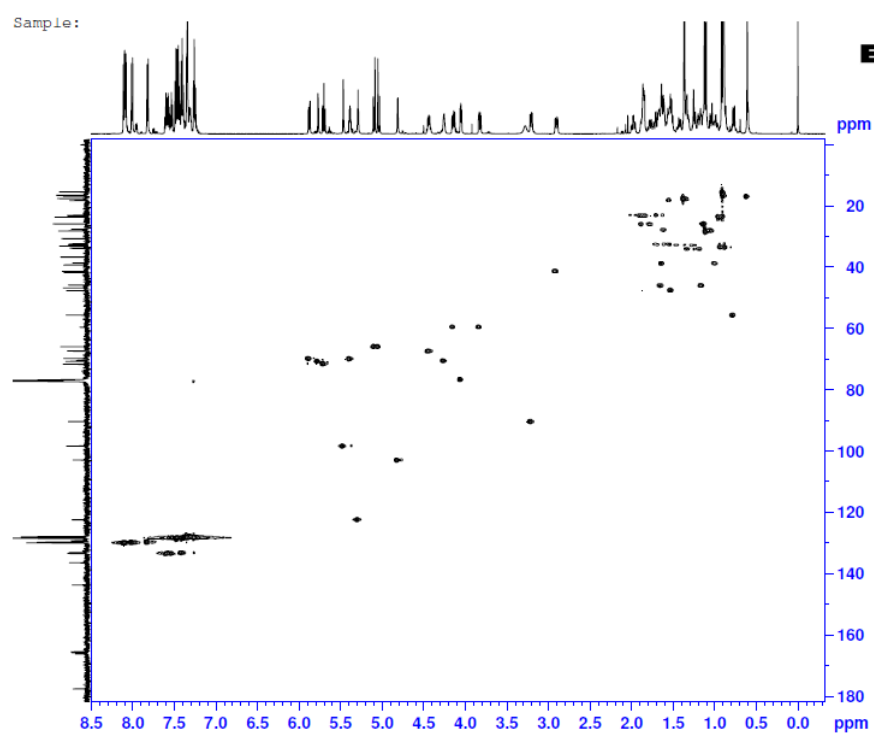

Figure S24. HMBC of compound 9.

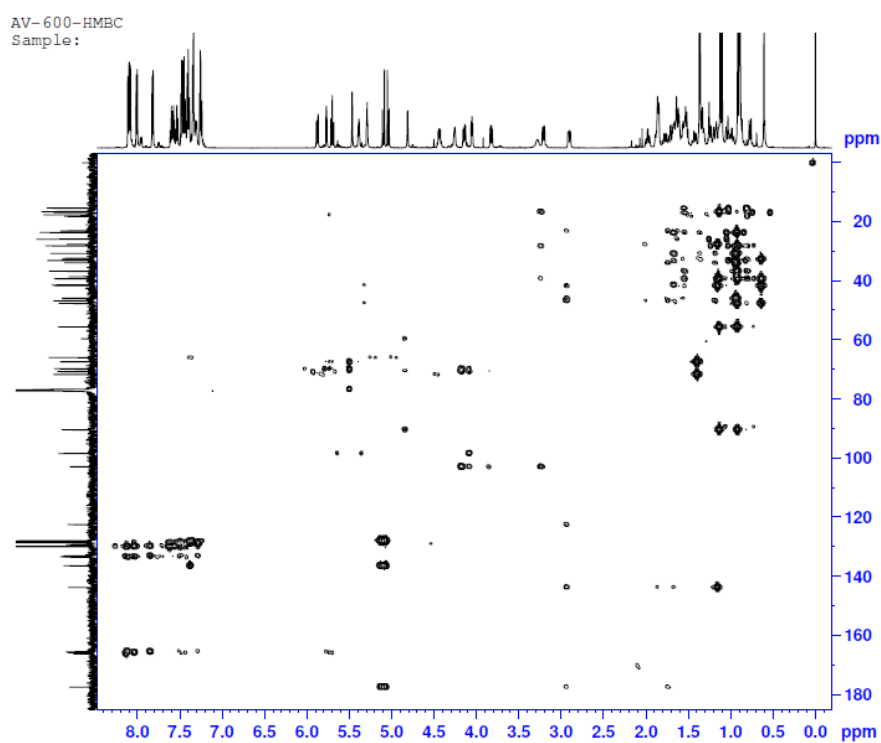

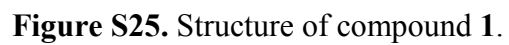

Figure S27.  $^1\text{H}$ -NMR of compound 1.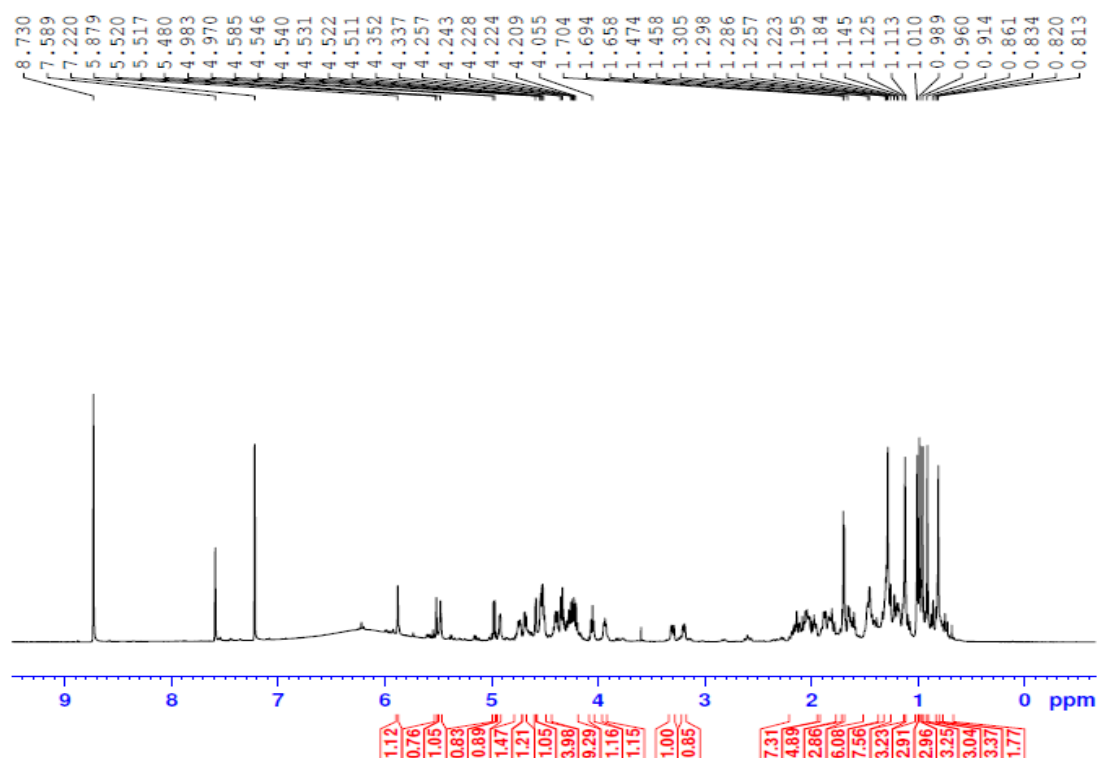Figure S28.  $^{13}\text{C}$ -NMR of compound 1.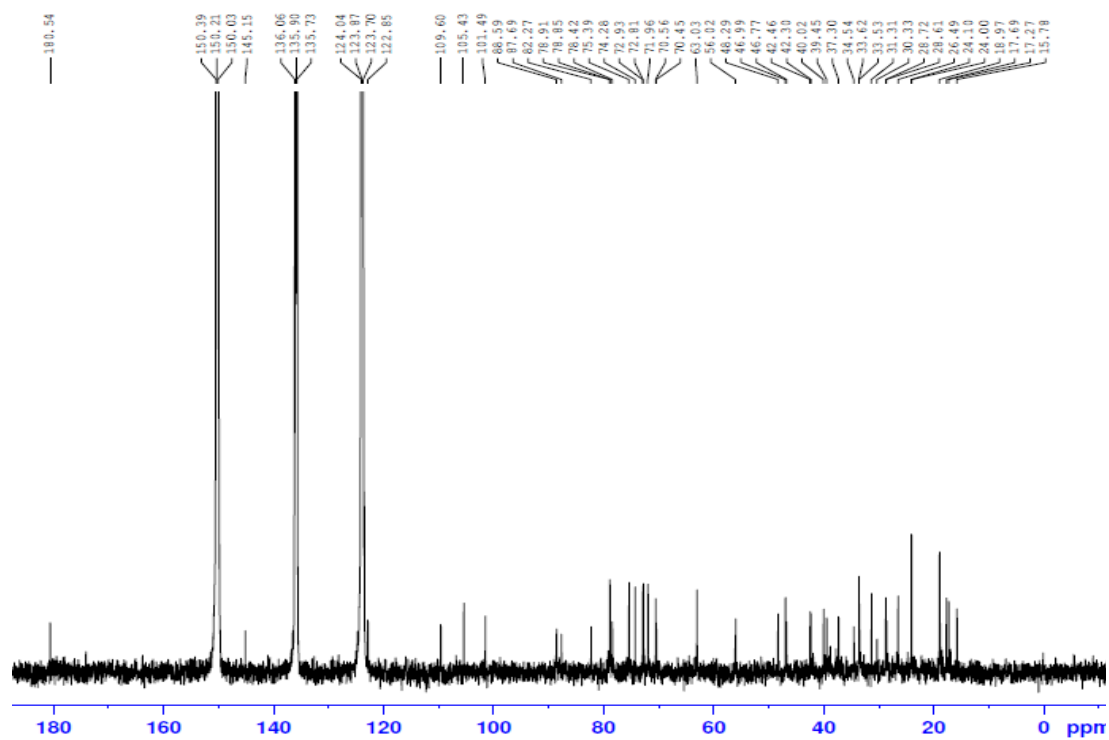

**Figure S29.** COSY of compound 1.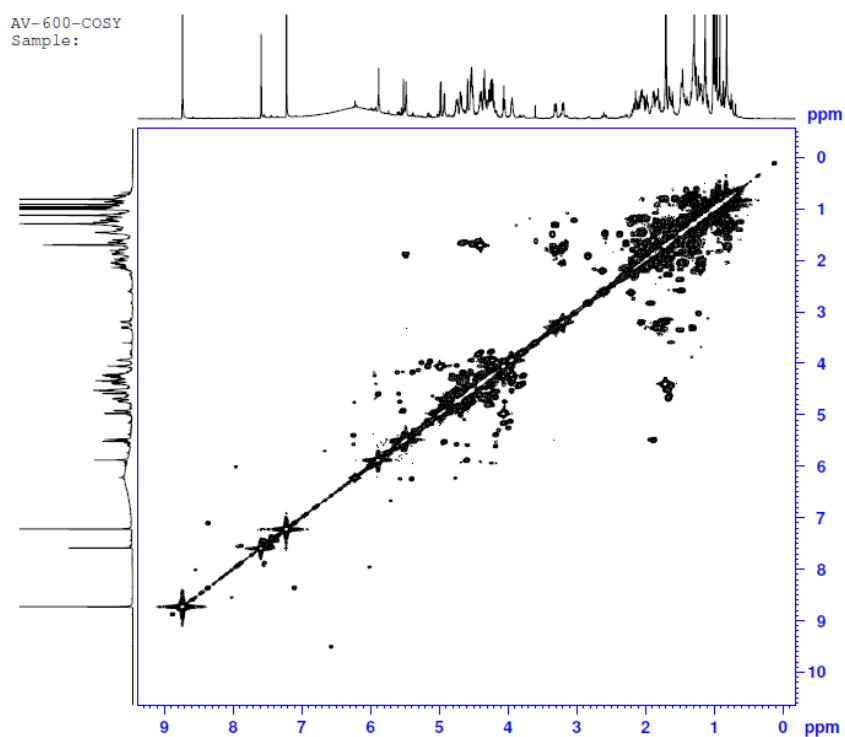**Figure S30.** HSQC of compound 1.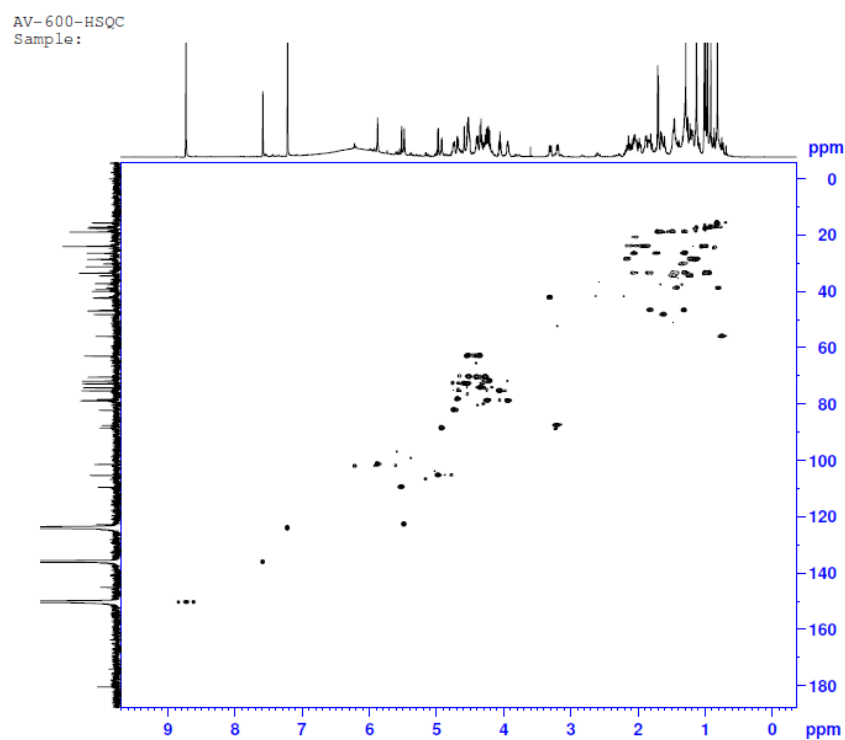



**Figure S31.** HMBC of compound 1.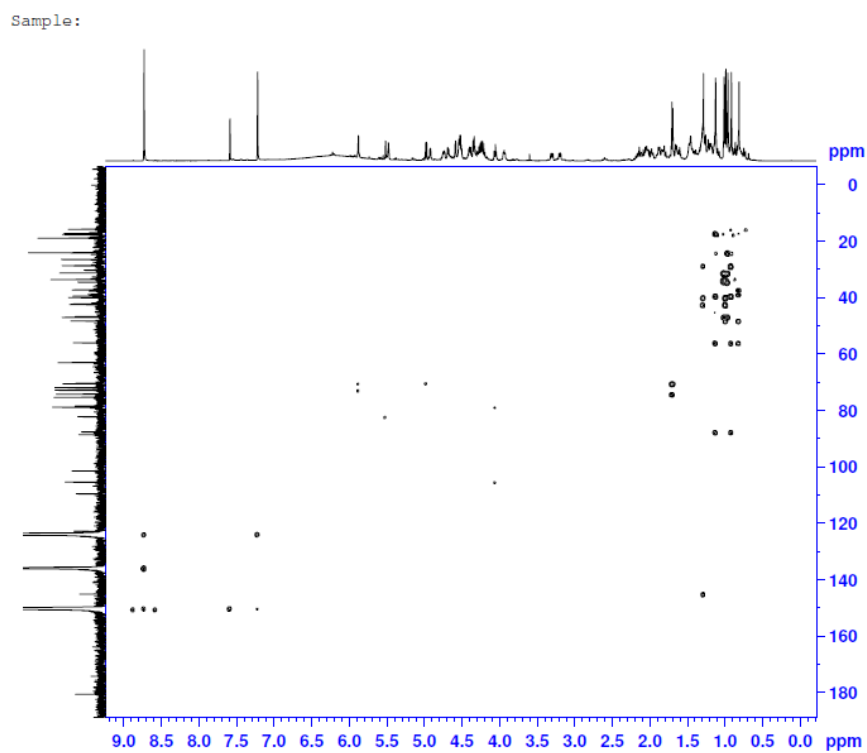**Figure S32.** NOESY of compound 1.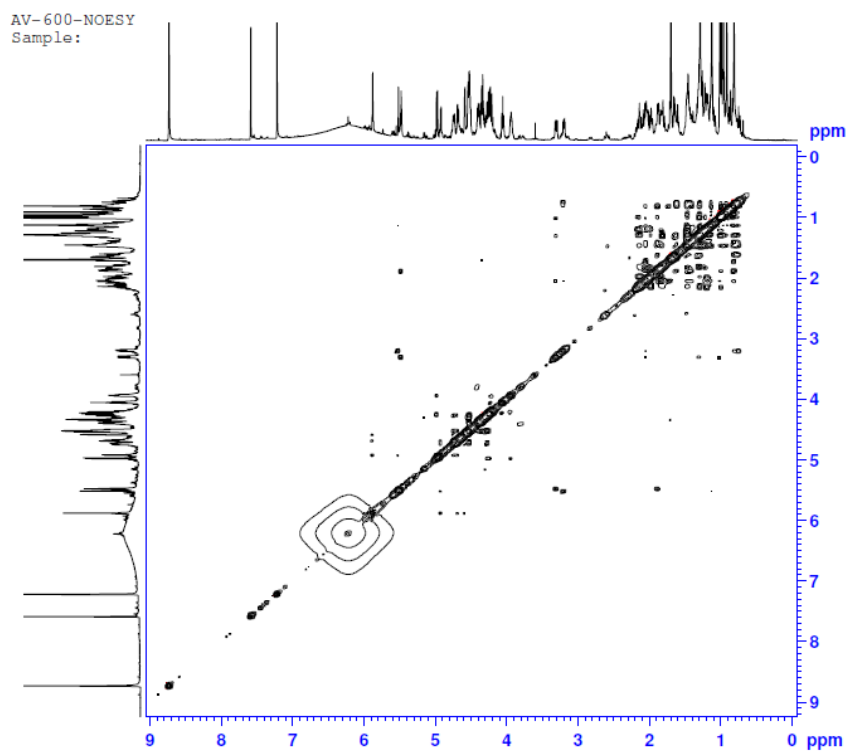

Figure S33. Structure of compound 11.

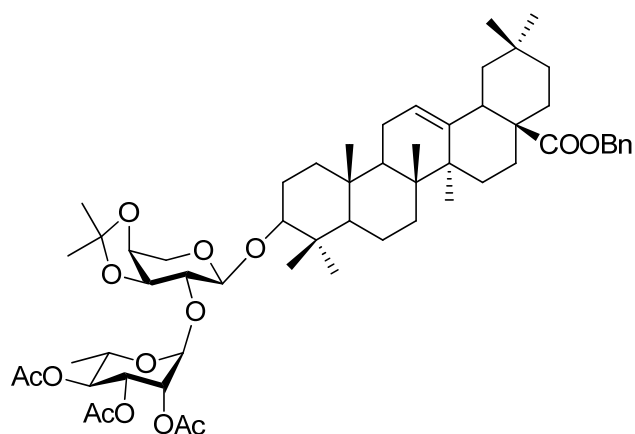Figure S34.  $^1\text{H}$ -NMR of compound 11.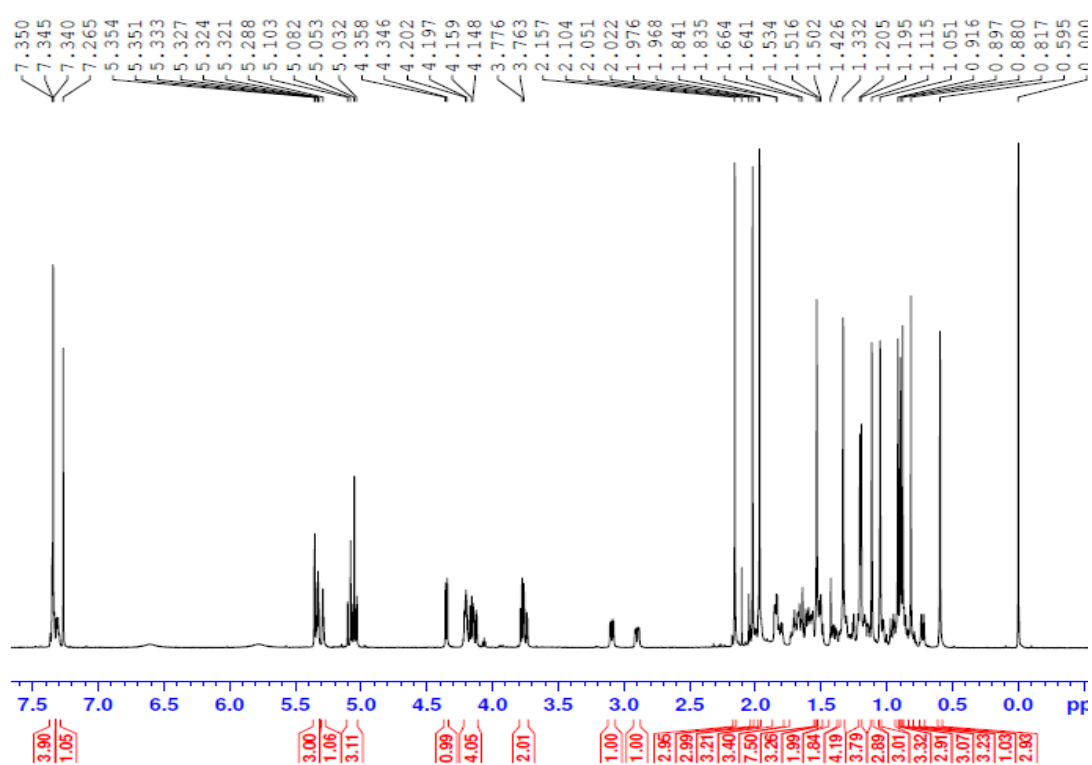

Figure S35.  $^{13}\text{C}$ -NMR of compound 11.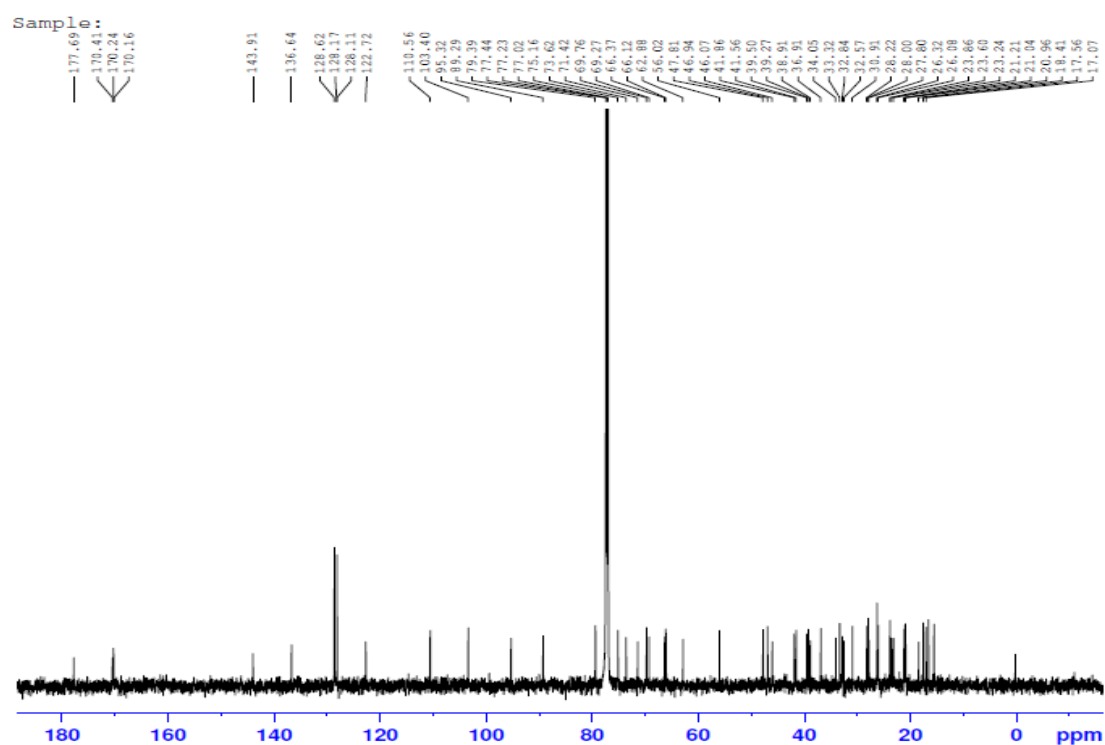

Figure S36. COSY of compound 11.

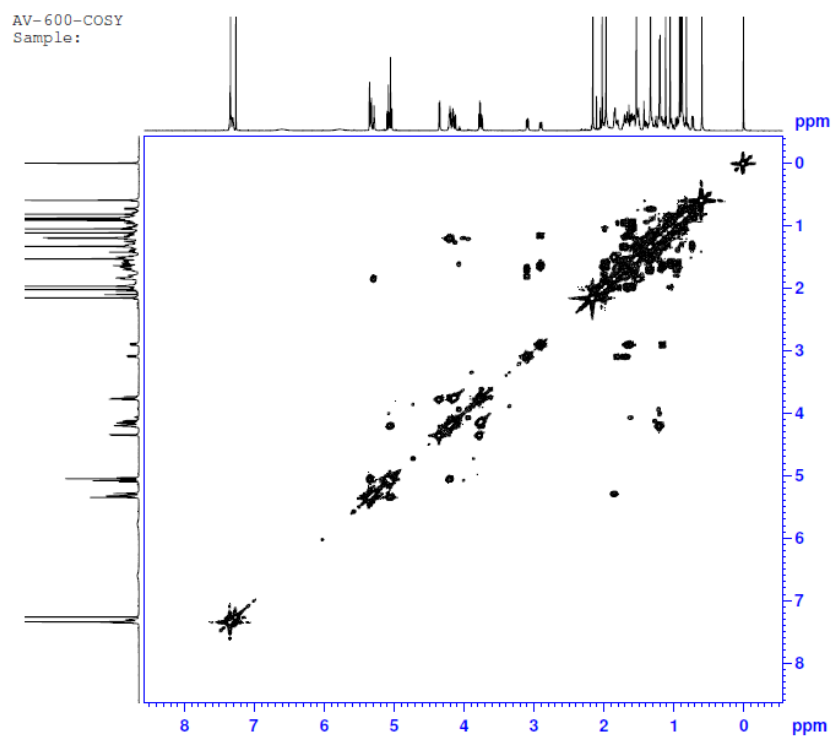

**Figure S37.** HSQC of compound **11**.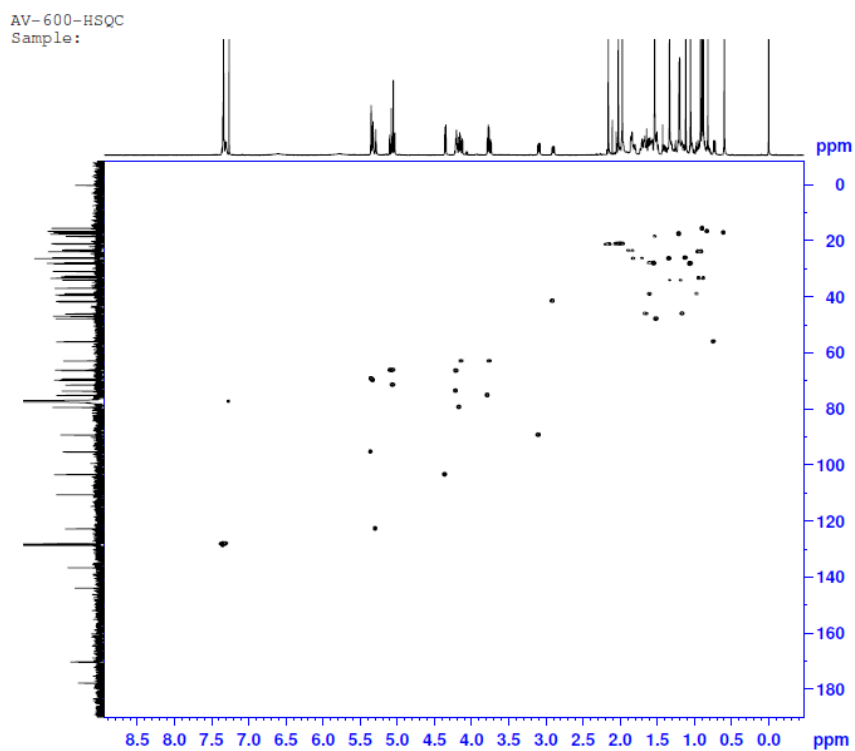**Figure S38.** HMBC of compound **11**.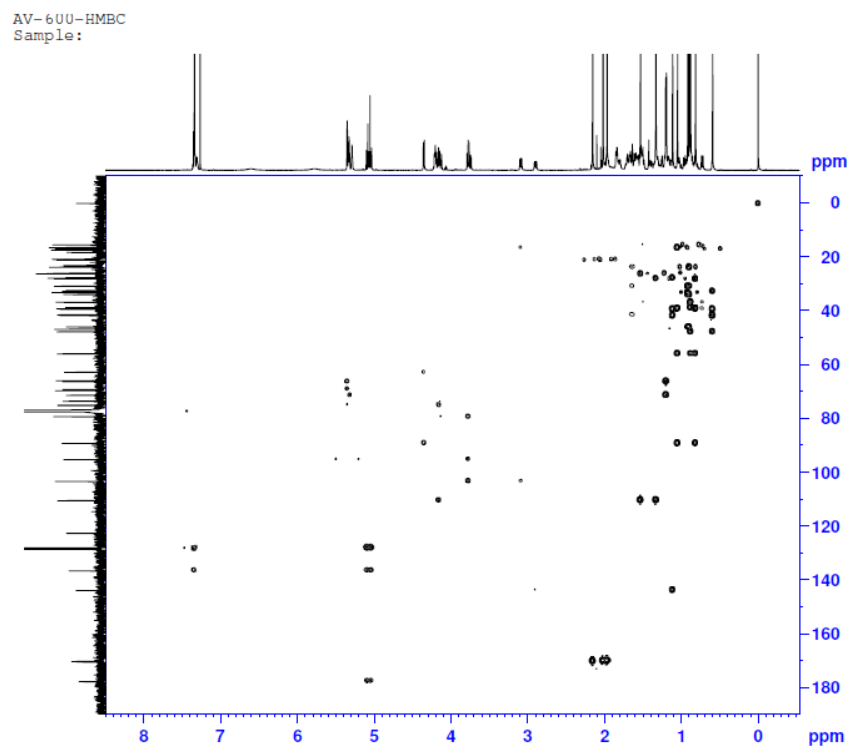

Figure S39. Structure of compound 12.

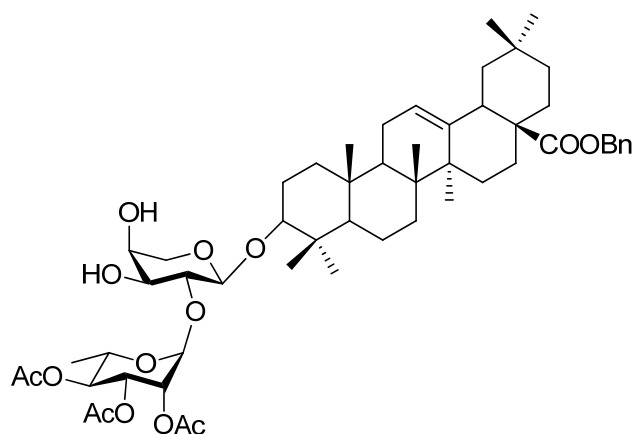Figure S40.  $^1\text{H}$ -NMR of compound 12.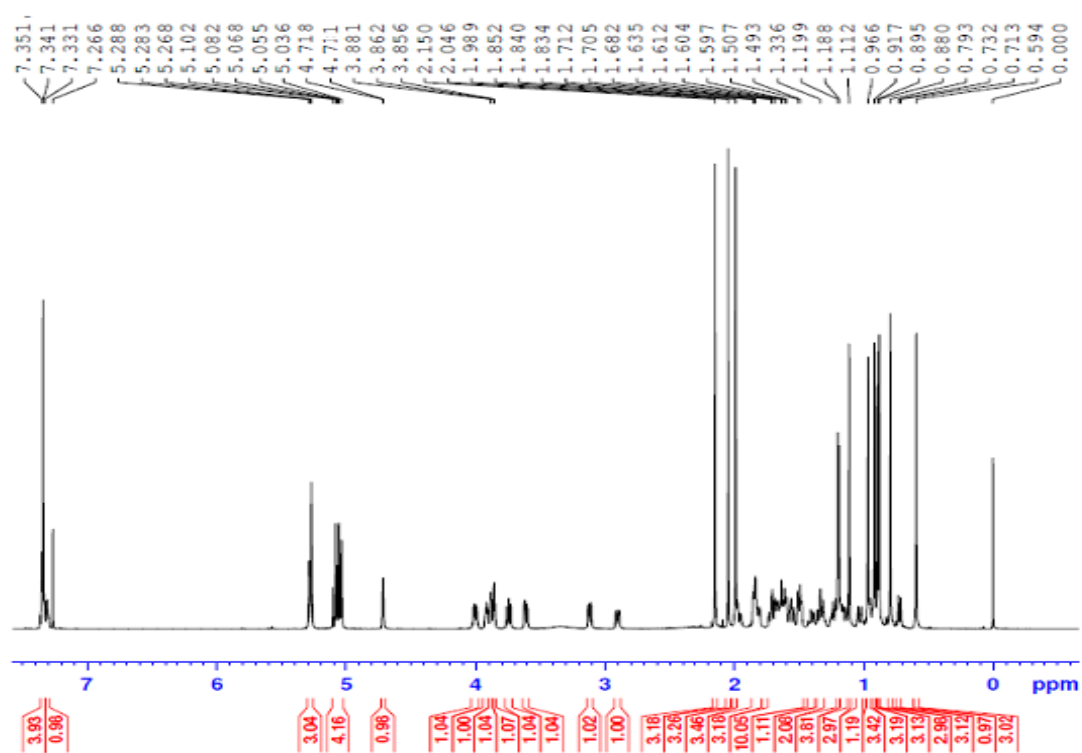

**Figure S41.**  $^{13}\text{C}$ -NMR of compound 12.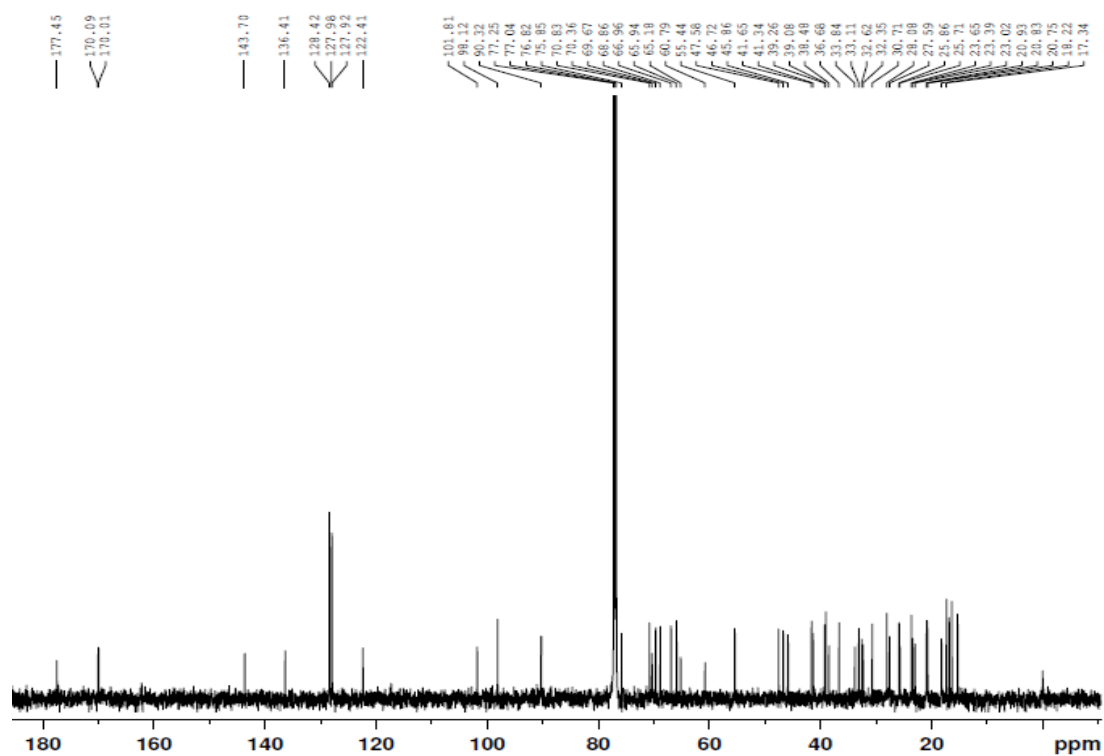**Figure S42.** COSY of compound 12.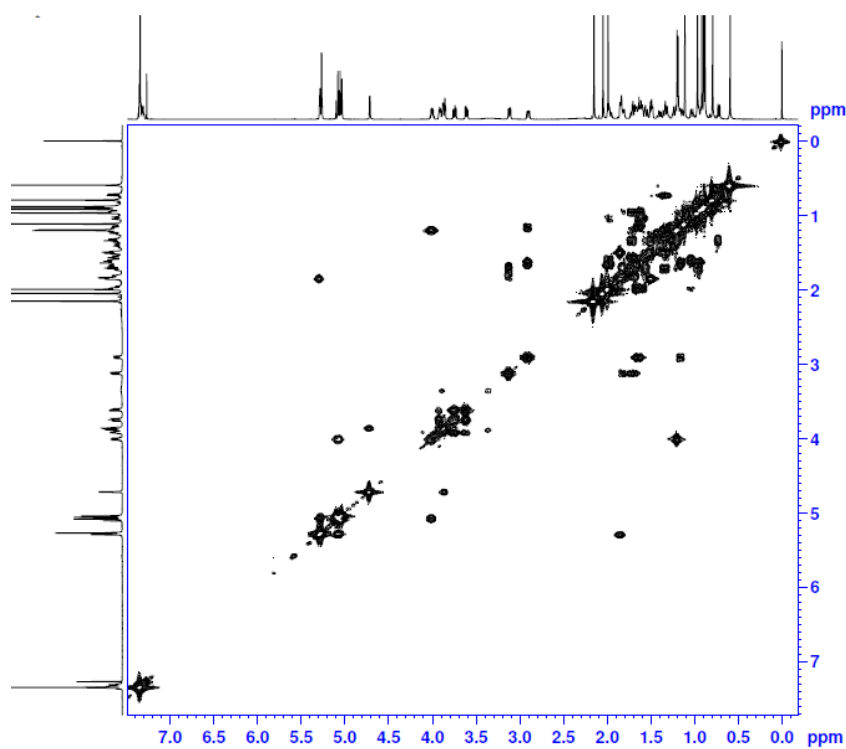

**Figure S43.** HSQC of compound 12.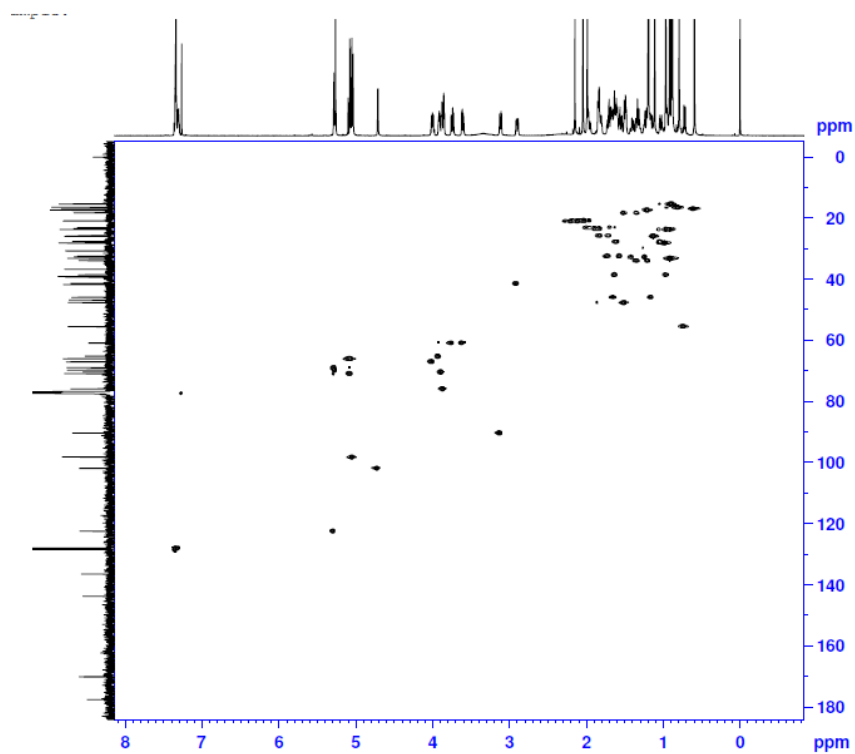**Figure S44.** HMBC of compound 12.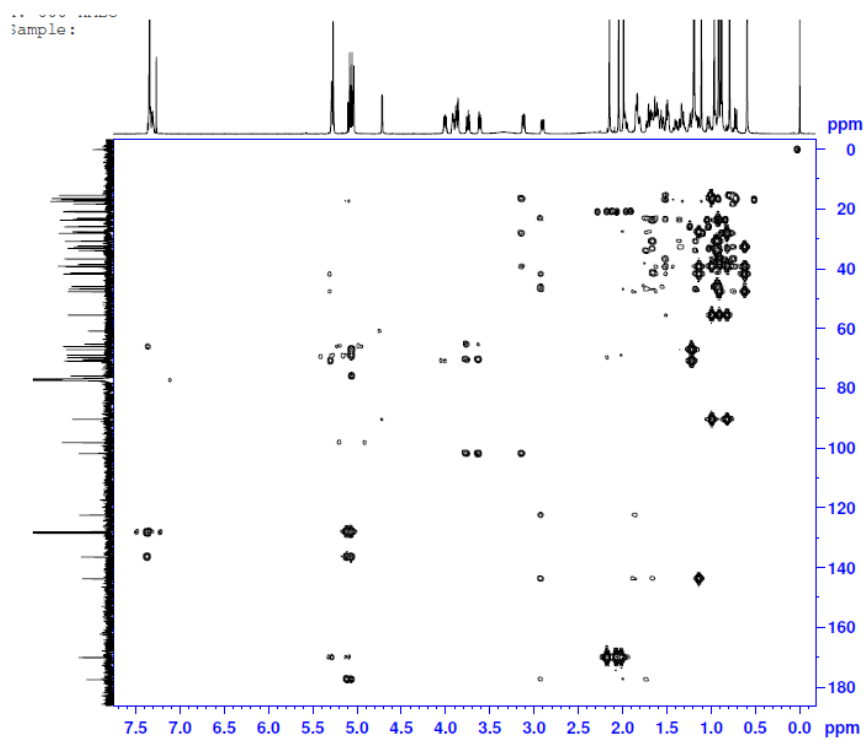

Figure S45. Structure of compound 13.

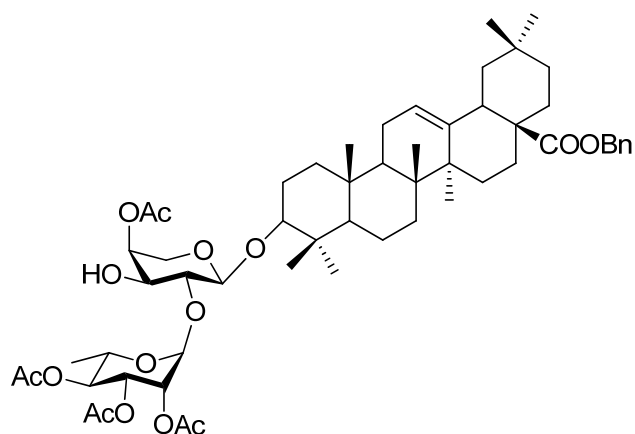Figure S46.  $^1\text{H}$ -NMR of compound 13.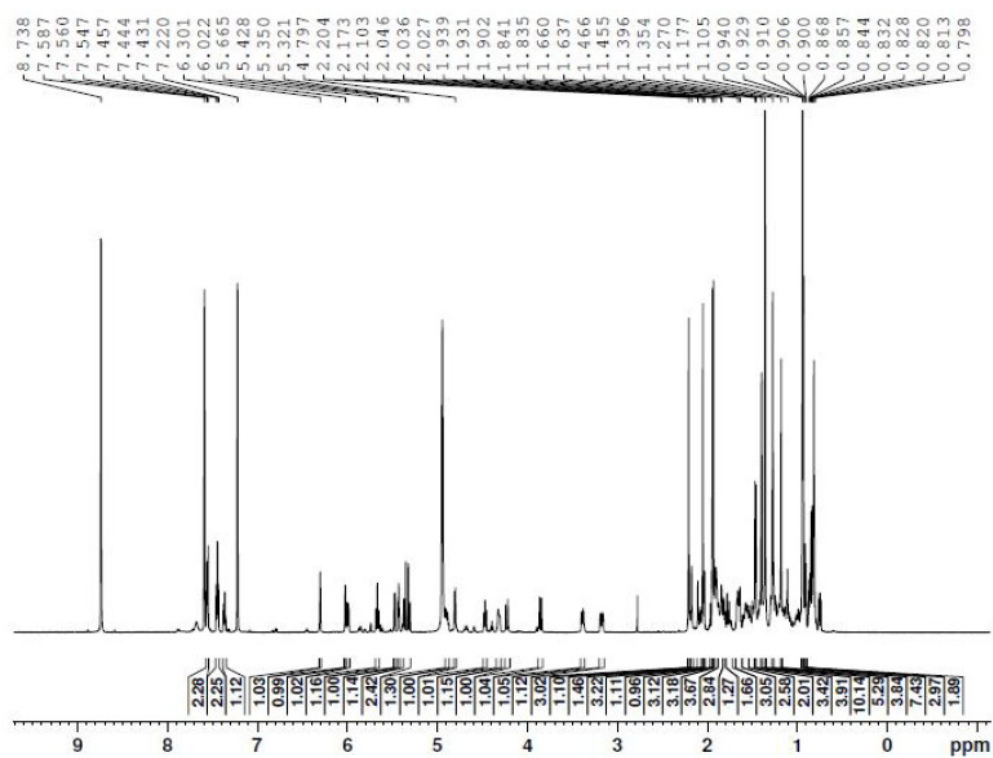



Figure S47.  $^{13}\text{C}$ -NMR of compound 13.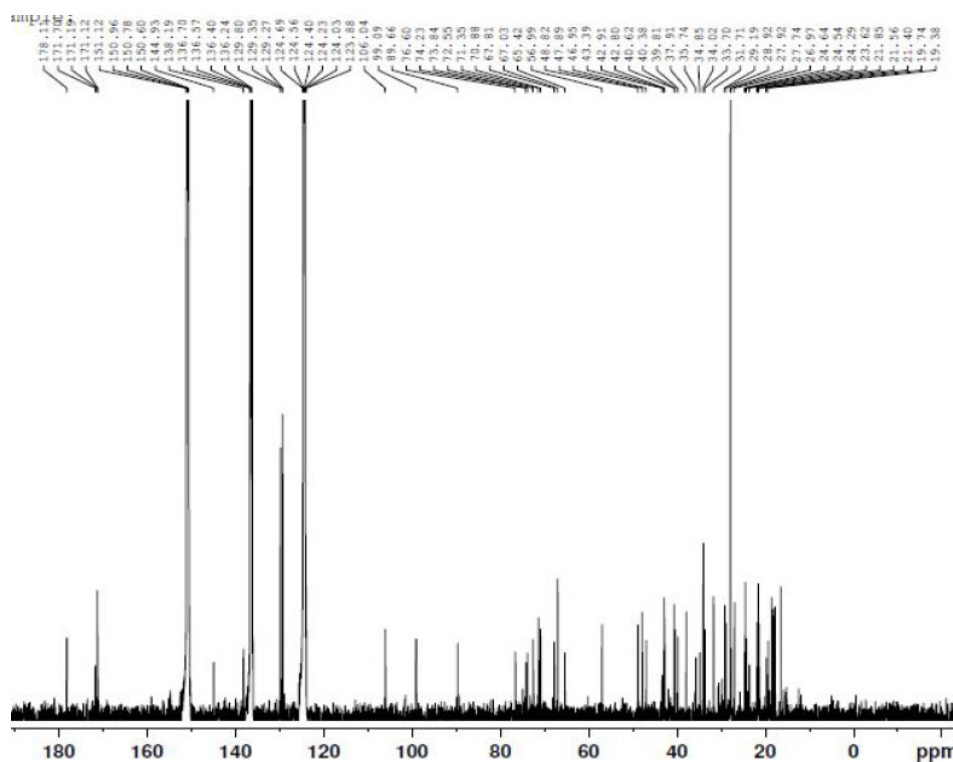

Figure S48. COSY of compound 13.

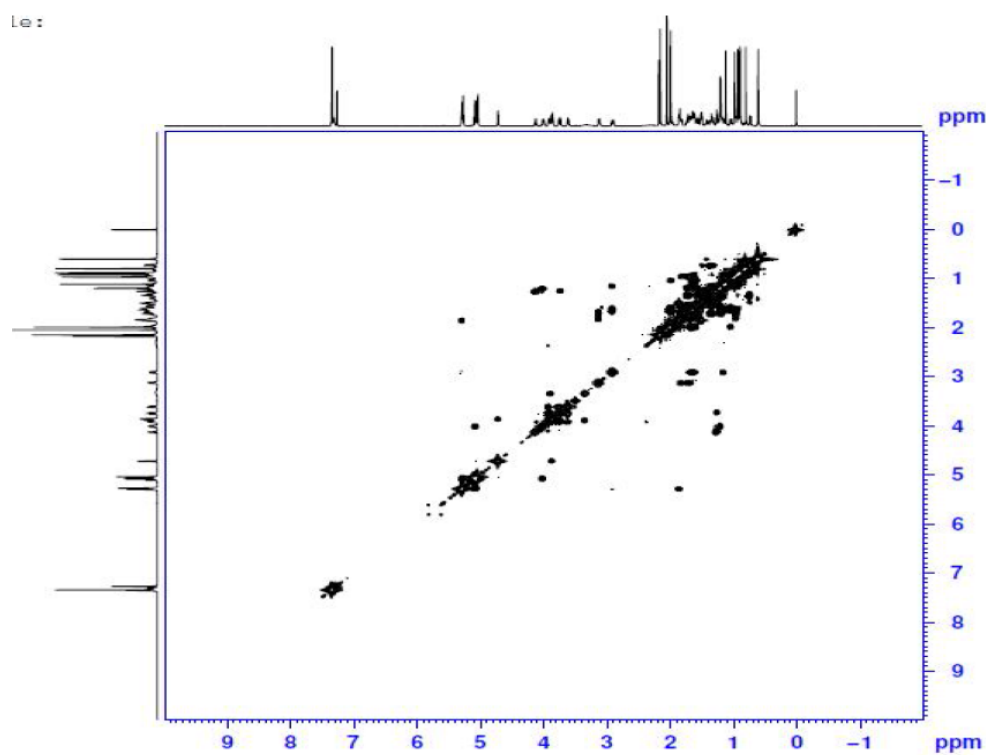

**Figure S49.** HSQC of compound 13.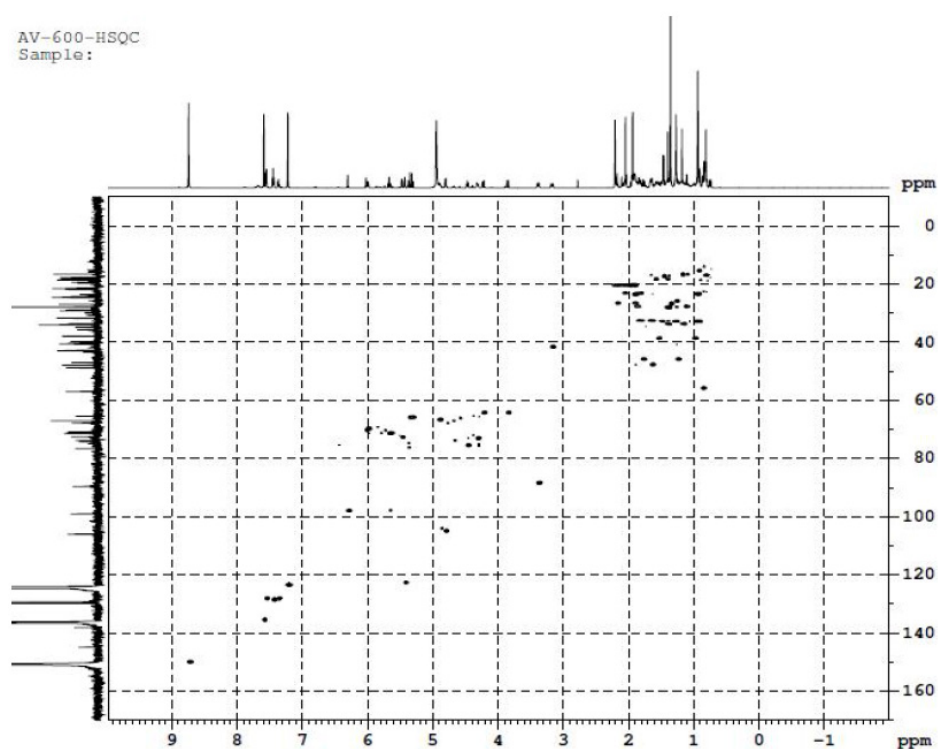**Figure S50.** Structure of Patrinia-glycoside B-II.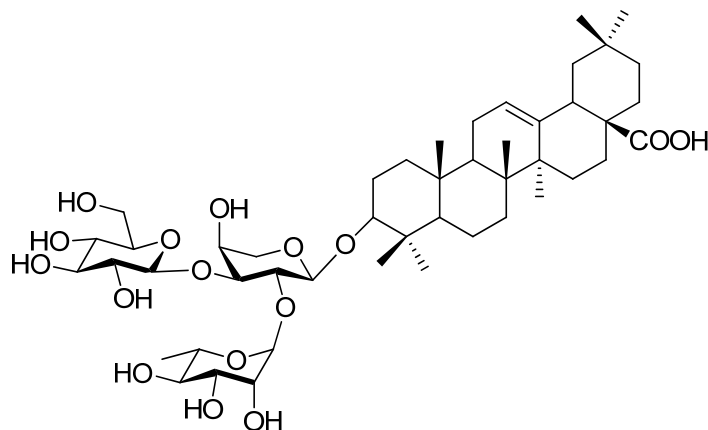

Figure S51. MS of Patrinia-glycoside B-II.

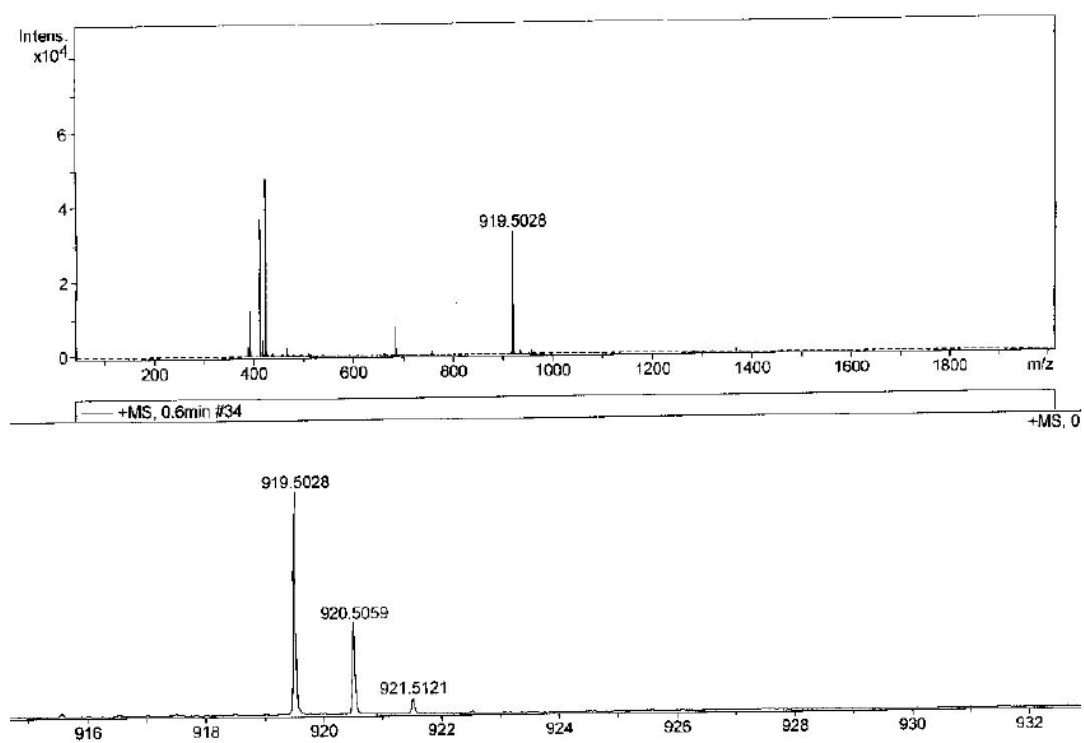Figure S52.  $^1\text{H}$ -NMR of Patrinia-glycoside B-II.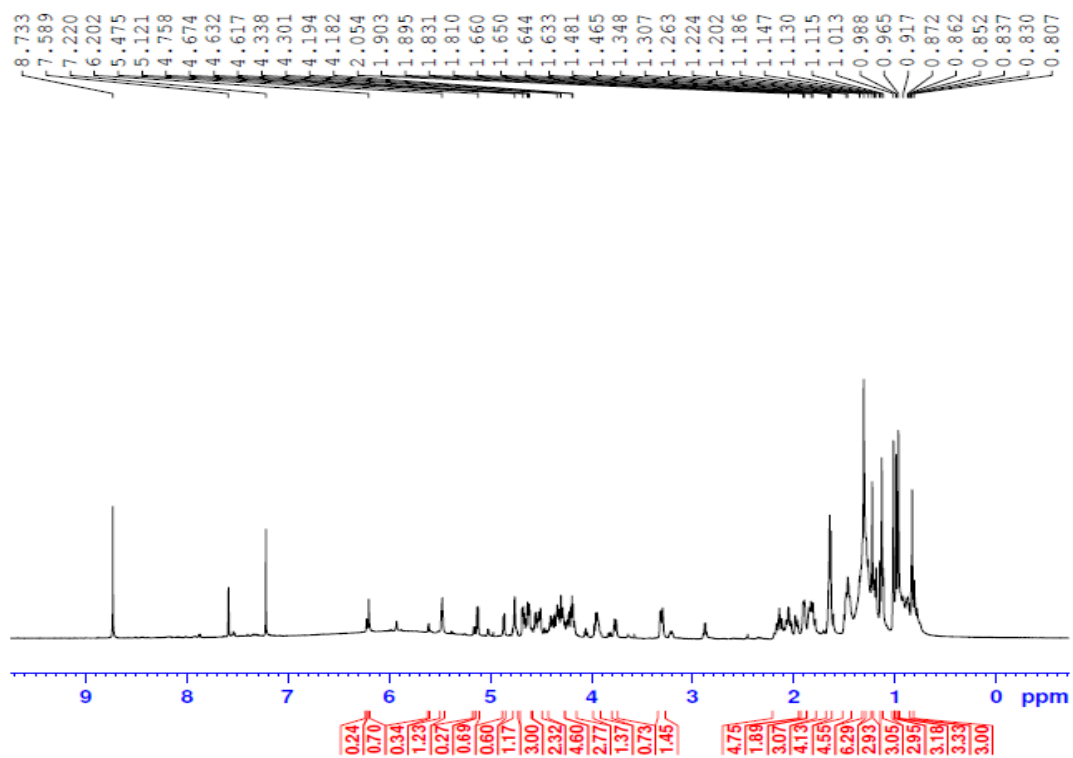

**Figure S53.**  $^{13}\text{C}$ -NMR of Patrinia-glycoside B-II.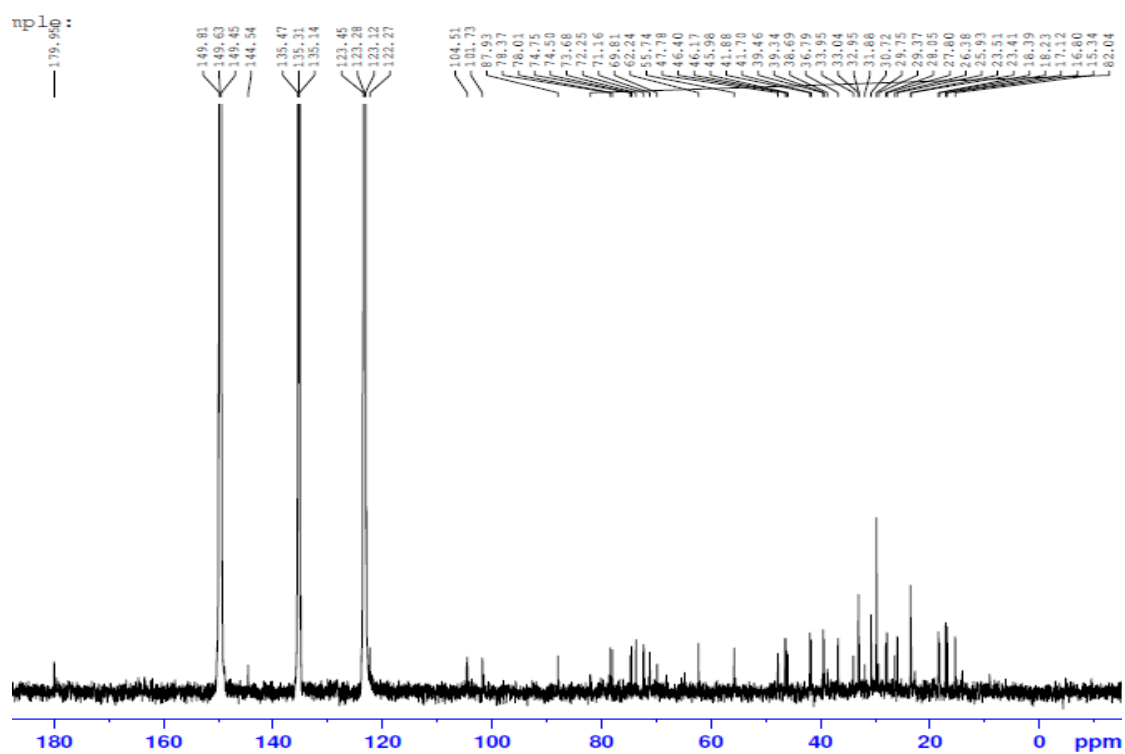**Figure S54.** COSY of Patrinia-glycoside B-II.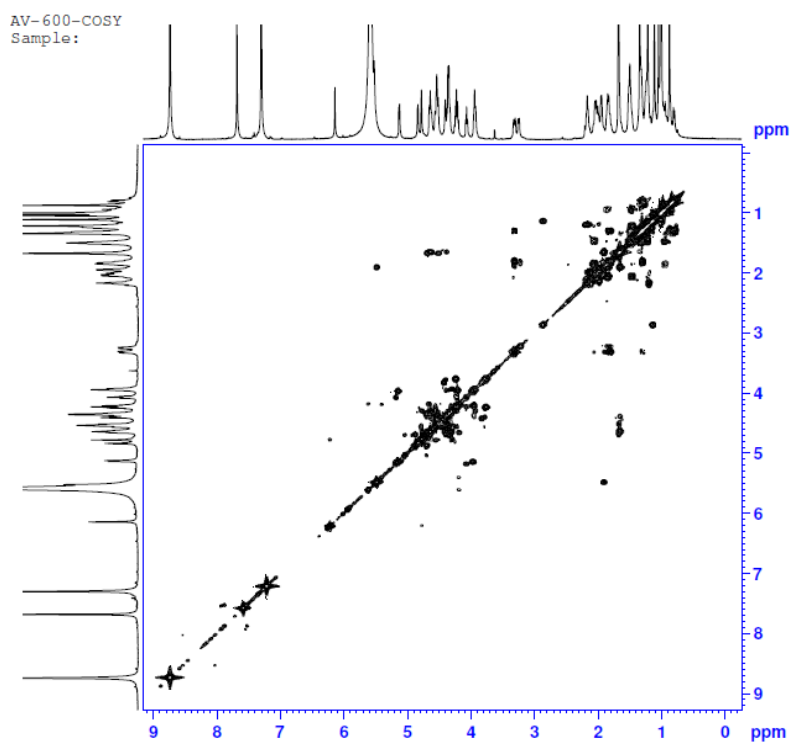

**Figure S55.** HSQC of Patrinia-glycoside B-II.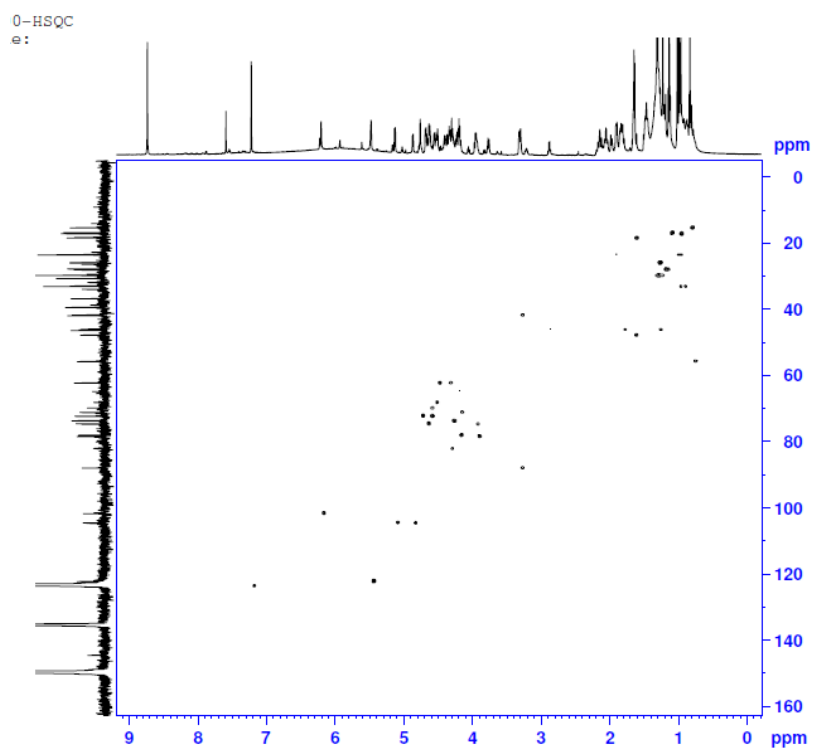**Figure S56.** HMBC of Patrinia-glycoside B-II.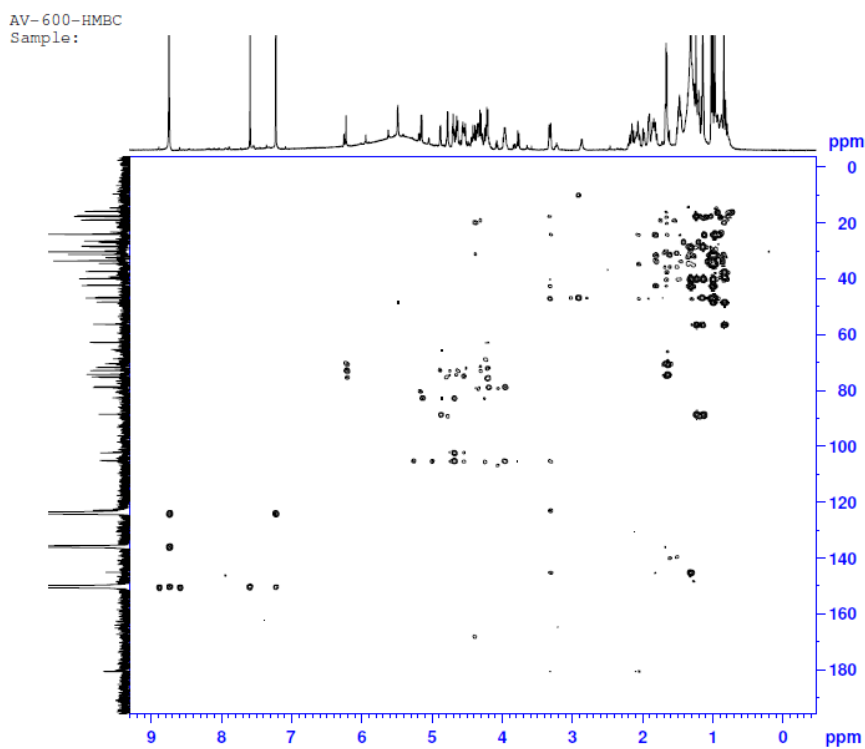

**Figure S57.** NOESY of Patrinia-glycoside B-II.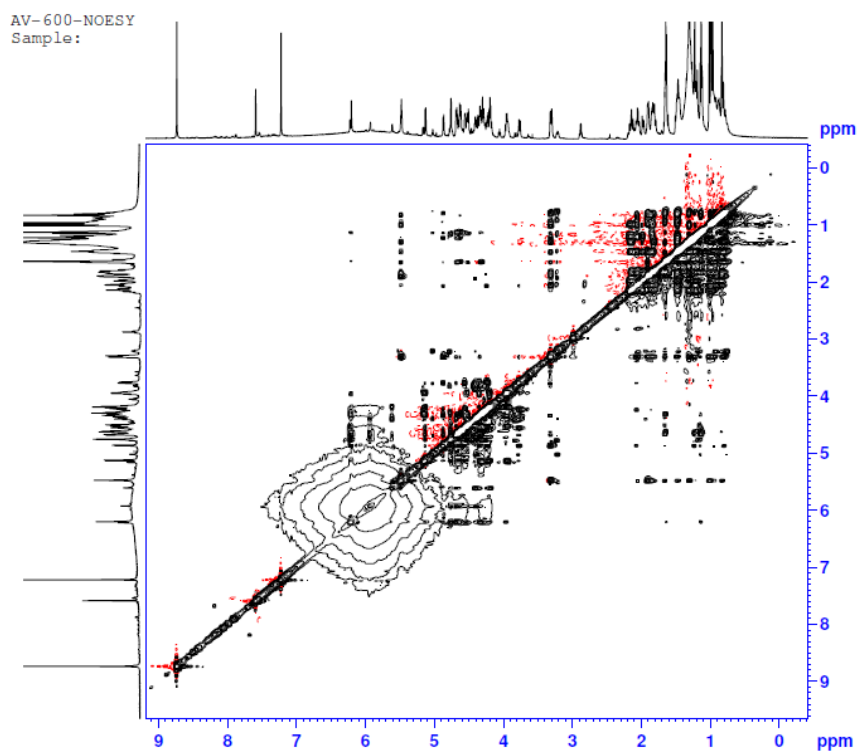

Supplement: s1 [file s1]
